# Supplementary material for: Palladium-catalyzed oxidative 6-exo-trig cyclization of 1,6-enynes: facile synthesis of bicyclo[4.1.0]heptan-5-ones
Source: Royal Society of Chemistry journal article supplement (doi:10.1039/c5cc04300j), 2015-01-01
Supplement: c5cc04300j1.pdf [file c5cc04300j1.pdf]

## Supporting Information

### **Palladium-Catalyzed Oxidative *6-exo-trig* Cyclization of 1,6-Enynes: Facile Synthesis of Bicyclo[4.1.0]heptan-5-ones**

Bang Liu, Ren-Jie Song,\* Xuan-Hui Ouyang, Yang Li, Ming Hu, and  
Jin-Heng Li\*

State Key Laboratory of Chemo/Biosensing and Chemometrics

College of Chemistry and Chemical Engineering, Hunan University,  
Changsha 410082, China, and State Key Laboratory of Applied Organic  
Chemistry Lanzhou University, Lanzhou 730000, China

E-mail: [srj0731@hnu.edu.cn](mailto:srj0731@hnu.edu.cn) and E-mail: [jhli@hnu.edu.cn](mailto:jhli@hnu.edu.cn)

---

# List of Contents

**(A) General Experimental Procedures**

**(B) Analytical data**

**(C) Spectra**

**(D) The X-ray Single-Crystal Diffraction Analysis**

---

## (1) General Procedures

### (a) General Procedures for the Pd-Catalyzed Oxidative 6-*exo-trig* Cyclization of 1,6-Enynes:

To a solution of 1,6-enyne **1** (0.2 mmol) in anhydrous 1,2-dichloroethane (1 mL) were added H<sub>2</sub>O (4 equiv), Pd(OAc)<sub>2</sub> (5 mol%) and *tert*-butyl nitrite (1.5 equiv). The mixture was stirred at room temperature for 16 or 24 h under air condition until complete consumption of starting material as monitored by TLC analysis. After the reaction was finished, the reaction mixture was washed with brine. The aqueous phase was re-extracted with EtOAc. The combined organic extracts were dried over Na<sub>2</sub>SO<sub>4</sub> and concentrated in vacuum. The residue was purified by silica gel flash column chromatography (hexane/ethyl acetate) to afford the desired products **2**.

### (b) Preparation of 1,6-Enyne Substrates

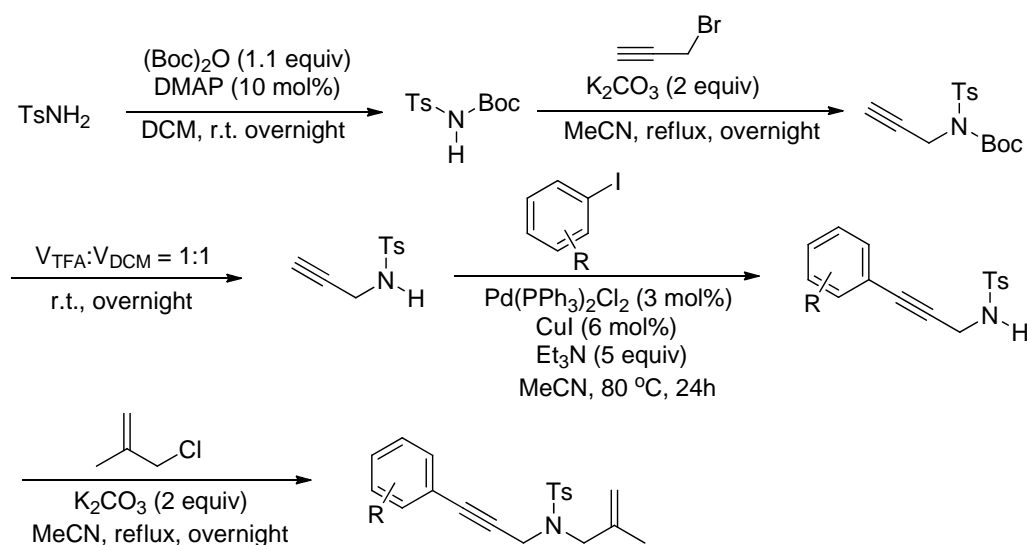

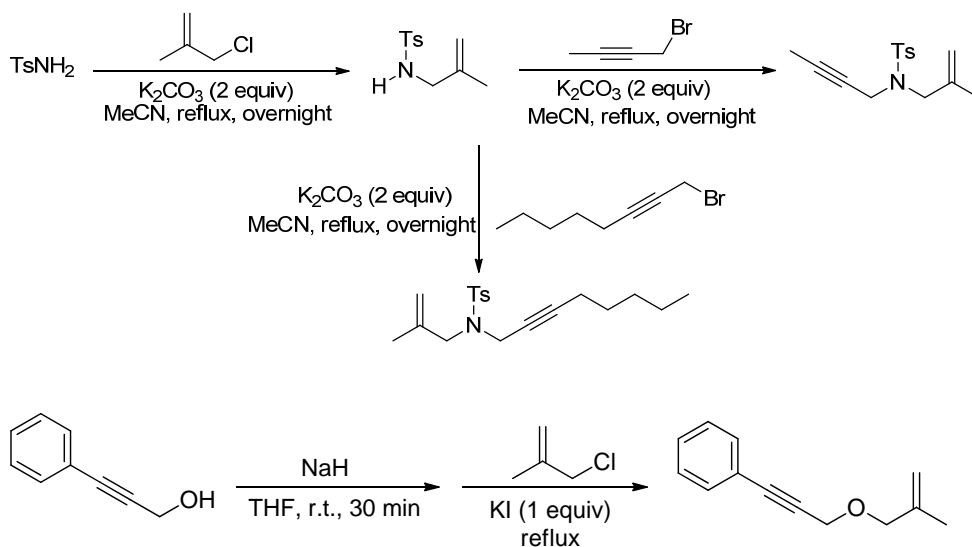

### (c) The $^{18}\text{O}$ -labeled Experiment

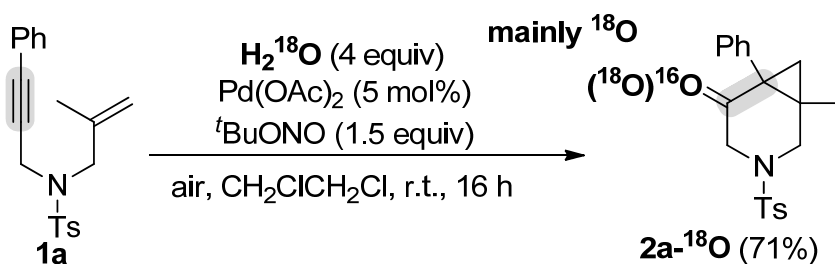

### 1-Methyl-6-phenyl-3-tosyl-3-azabicyclo[4.1.0]heptan-5-one (**2a**)

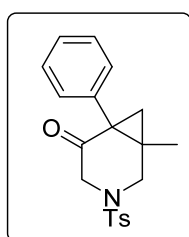

Chemical Formula:  $\text{C}_{20}\text{H}_{21}\text{NO}_3\text{S}$

Molecular Weight: 355

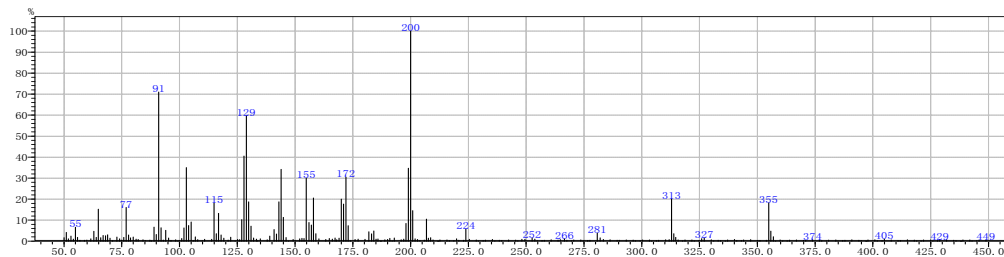

---

[MS Spectrum]

# of Peaks 266

Raw Spectrum 22.570 (scan : 3815) Base Peak m/z 200.00 (Inten : 167,814)

Background No Background Spectrum

| m/z    | Absolute Intensity |       |        | Relative Intensity |       |               |              |              |
|--------|--------------------|-------|--------|--------------------|-------|---------------|--------------|--------------|
| 51.00  | 6940               | 4.14  | 118.00 | 4983               | 2.97  | 200.00        | 167814       | 100.00       |
| 53.00  | 4057               | 2.42  | 126.95 | 17135              | 10.21 | 200.95        | 24382        | 14.53        |
| 55.00  | 11081              | 6.60  | 127.95 | 67909              | 40.47 | 206.90        | 17654        | 10.52        |
| 62.95  | 7955               | 4.74  | 128.95 | 100141             | 59.67 | 223.90        | 9580         | 5.71         |
| 64.95  | 25529              | 15.21 | 129.95 | 31391              | 18.71 | 280.75        | 6475         | 3.86         |
| 76.95  | 26951              | 16.06 | 143.00 | 31481              | 18.76 | 281.95        | 2668         | 1.59         |
| 78.00  | 5042               | 3.00  | 143.95 | 57352              | 34.18 | 312.90        | 33833        | 20.16        |
| 88.95  | 11253              | 6.71  | 144.95 | 18945              | 11.29 | 313.90        | 5918         | 3.53         |
| 90.00  | 5366               | 3.20  | 154.90 | 50297              | 29.97 | <b>354.90</b> | <b>30641</b> | <b>18.26</b> |
| 91.00  | 119097             | 70.97 | 156.00 | 15028              | 8.96  | 355.85        | 8088         | 4.82         |
| 92.00  | 10690              | 6.37  | 157.00 | 12914              | 7.70  | <b>356.95</b> | <b>3570</b>  | <b>2.13</b>  |
| 94.00  | 8609               | 5.13  | 157.95 | 34473              | 20.54 | 357.90        | 121          | 0.07         |
| 101.95 | 10596              | 6.31  | 159.00 | 5975               | 3.56  | 359.90        | 924          | 0.55         |
| 102.95 | 58783              | 35.03 | 170.00 | 33556              | 20.00 |               |              |              |
| 103.95 | 12556              | 7.48  | 171.00 | 29601              | 17.64 |               |              |              |
| 105.00 | 15318              | 9.13  | 172.00 | 51199              | 30.51 |               |              |              |
| 114.95 | 30530              | 18.19 | 173.00 | 12482              | 7.44  |               |              |              |
| 115.95 | 5981               | 3.56  | 198.00 | 14103              | 8.40  |               |              |              |
| 116.95 | 22108              | 13.17 | 199.00 | 58356              | 34.77 |               |              |              |

# 1-Methyl-6-phenyl-3-tosyl-3-azabicyclo[4.1.0]heptan-5-one ( $2a\text{-}^{18}\text{O}$ )

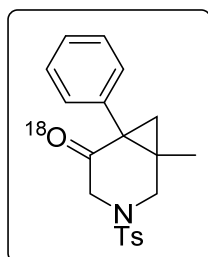

Chemical Formula:  $\text{C}_{20}\text{H}_{21}\text{NO}_2^{18}\text{OS}$

Molecular Weight: 357

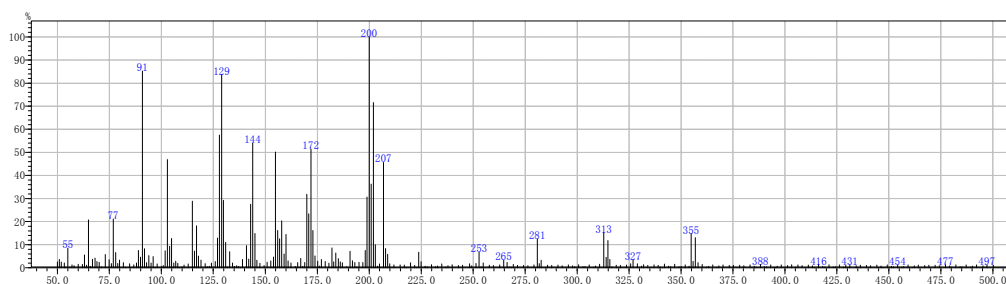

[MS Spectrum]

# of Peaks 307

Raw Spectrum 22.445 (scan : 3790) Base Peak m/z 199.95 (Inten : 98,709)

Background No Background Spectrum

| m/z   | Absolute Intensity | Relative Intensity |
|-------|--------------------|--------------------|
| 50.90 | 4721               | 4.78               |
| 52.10 | 1994               | 2.02               |
| 55.05 | 6997               | 7.09               |
| 62.95 | 4317               | 4.37               |
| 63.95 | 2402               | 2.43               |
| 65.00 | 18570              | 18.81              |
| 67.00 | 4234               | 4.29               |
| 67.95 | 3044               | 3.08               |
| 73.00 | 2644               | 2.68               |
| 75.05 | 2227               | 2.26               |
| 76.95 | 21404              | 21.68              |
| 78.00 | 3980               | 4.03               |
| 78.95 | 3051               | 3.09               |
| 80.10 | 2625               | 2.66               |
| 81.95 | 3073               | 3.11               |
| 88.90 | 8748               | 8.86               |
| 90.05 | 4562               | 4.62               |
| 90.95 | 86321              | 87.45              |
| 91.95 | 9594               | 9.72               |
| 93.90 | 5638               | 5.71               |

---

|        |       |       |        |       |        |                      |                     |                     |
|--------|-------|-------|--------|-------|--------|----------------------|---------------------|---------------------|
| 95.05  | 2383  | 2.41  | 154.90 | 49143 | 49.79  | 202.95               | 9468                | 9.59                |
| 101.90 | 9385  | 9.51  | 155.95 | 15574 | 15.78  | 206.85               | 31054               | 31.46               |
| 102.95 | 46098 | 46.70 | 156.95 | 11300 | 11.45  | 207.85               | 5833                | 5.91                |
| 103.90 | 9617  | 9.74  | 157.95 | 22921 | 23.22  | 208.85               | 5534                | 5.61                |
| 104.95 | 10898 | 11.04 | 159.00 | 5410  | 5.48   | 223.85               | 8764                | 8.88                |
| 106.85 | 3879  | 3.93  | 159.95 | 14827 | 15.02  | 248.70               | 2569                | 2.60                |
| 114.95 | 28339 | 28.71 | 161.00 | 3532  | 3.58   | 252.90               | 3385                | 3.43                |
| 115.95 | 5666  | 5.74  | 162.80 | 2202  | 2.23   | 264.90               | 2652                | 2.69                |
| 116.95 | 19522 | 19.78 | 169.95 | 31494 | 31.91  | 266.75               | 2724                | 2.76                |
| 118.05 | 4381  | 4.44  | 170.95 | 24633 | 24.96  | 280.85               | 6880                | 6.97                |
| 126.95 | 14100 | 14.28 | 172.00 | 49314 | 49.96  | 281.85               | 2393                | 2.42                |
| 127.95 | 57883 | 58.64 | 172.90 | 17106 | 17.33  | 282.95               | 2124                | 2.15                |
| 128.95 | 84826 | 85.94 | 174.05 | 4786  | 4.85   | 312.85               | 16549               | 16.77               |
| 129.95 | 29147 | 29.53 | 175.05 | 2177  | 2.21   | 313.85               | 2914                | 2.95                |
| 131.00 | 9079  | 9.20  | 182.00 | 6998  | 7.09   | 314.85               | 13024               | 13.19               |
| 132.95 | 5434  | 5.51  | 182.95 | 3762  | 3.81   | 315.95               | 3480                | 3.53                |
| 134.80 | 2564  | 2.60  | 183.95 | 6016  | 6.09   | 325.95               | 1944                | 1.97                |
| 138.95 | 2345  | 2.38  | 184.90 | 2519  | 2.55   | 326.95               | 1458                | 1.48                |
| 141.00 | 7924  | 8.03  | 185.90 | 4538  | 4.60   | 330.90               | 2028                | 2.05                |
| 141.95 | 3369  | 3.41  | 190.85 | 5881  | 5.96   | 345.90               | 1409                | 1.43                |
| 143.00 | 29014 | 29.39 | 192.70 | 2782  | 2.82   | <b><u>354.90</u></b> | <b><u>13996</u></b> | <b><u>14.18</u></b> |
| 144.00 | 49103 | 49.75 | 197.95 | 7895  | 8.00   | 355.85               | 4073                | 4.13                |
| 144.95 | 16786 | 17.01 | 199.00 | 32799 | 33.23  | <b><u>356.90</u></b> | <b><u>11098</u></b> | <b><u>11.24</u></b> |
| 146.10 | 2582  | 2.62  | 199.95 | 98709 | 100.00 | 357.85               | 2384                | 2.42                |
| 152.90 | 3908  | 3.96  | 200.95 | 38283 | 38.78  | <b><u>358.90</u></b> | <b><u>1737</u></b>  | <b><u>1.76</u></b>  |
| 153.95 | 3032  | 3.07  | 202.00 | 70673 | 71.60  |                      |                     |                     |

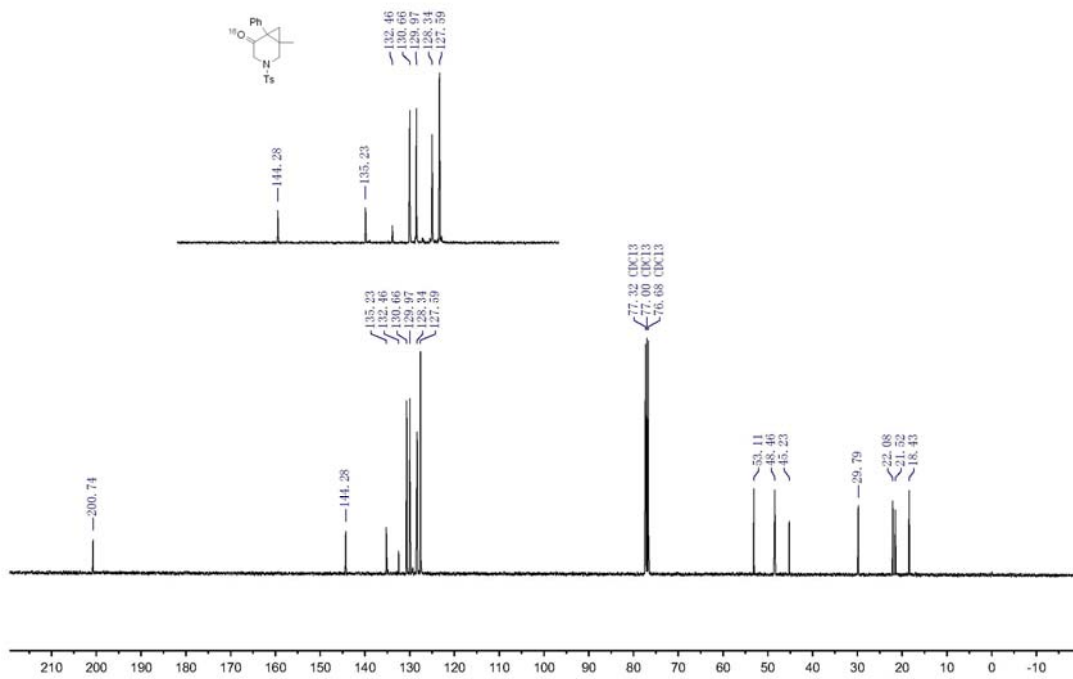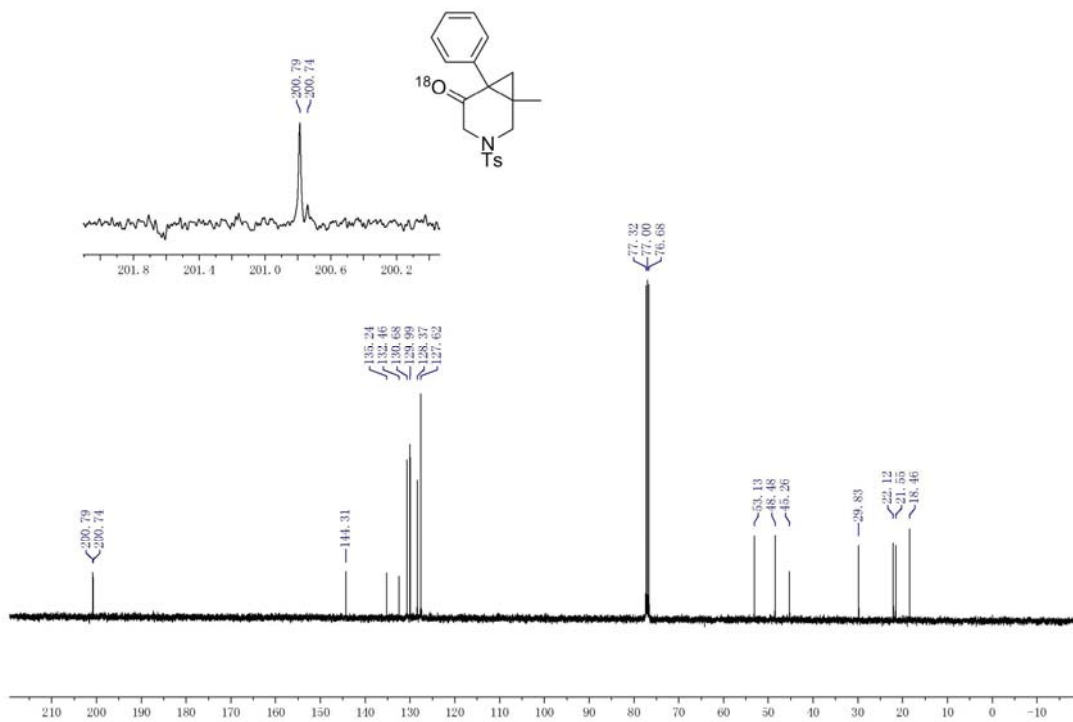



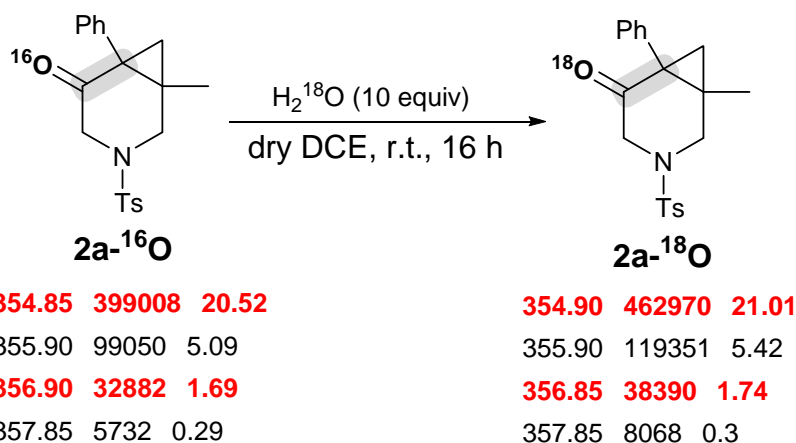

### (d) The examples of natural products and pharmaceuticals

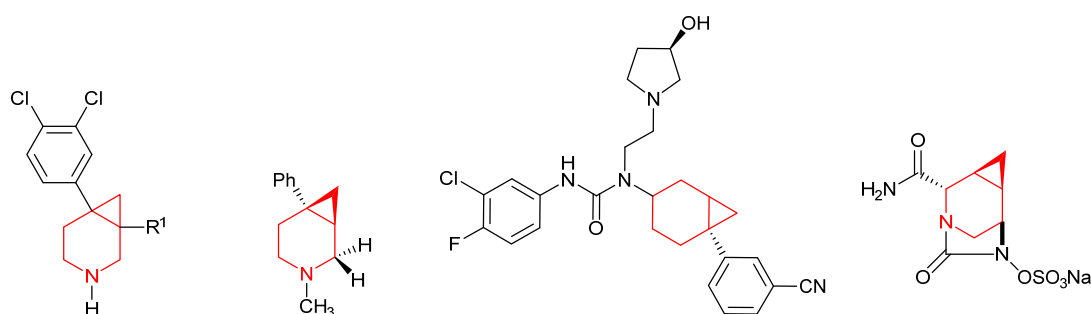

### (2) Analytical data

#### 1-Methyl-6-phenyl-3-tosyl-3-azabicyclo[4.1.0]heptan-5-one (2a)

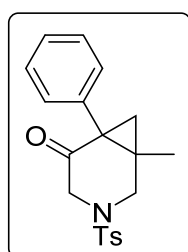

<sup>1</sup>H NMR (400 MHz, CDCl<sub>3</sub>) δ 7.68 (d, *J* = 8.4 Hz, 2H), 7.37 (d, *J* = 8.0 Hz, 2H), 7.33 - 7.27 (m, 3H), 7.04 (d, *J* = 6.8 Hz, 2H), 4.26 (d, *J* = 18.0 Hz, 1H), 4.08 (d, *J* = 12.0 Hz, 1H), 3.06 (d, *J* = 18.0 Hz, 1H), 2.79 (d, *J* = 12.0 Hz, 1H), 2.46 (m, 4H), 1.57 (d, *J* = 5.2 Hz, 1H), 0.97 (s, 3H); <sup>13</sup>C NMR (100 MHz, CDCl<sub>3</sub>) δ 200.7, 144.3, 135.2, 132.5, 130.7, 130.0, 128.3, 127.6, 53.1, 48.5, 45.2, 29.8, 22.1, 21.5, 18.4; LRMS (EI, 70 eV) *m/z*

---

(%): 355 ( $M^+$ , 18), 313 (20), 200 (100), 91 (71); HRMS (ESI): calculated for  $[C_{20}H_{22}NO_3S^+]$  356.1315, found 356.1325.

**1-Methyl-3-(phenylsulfonyl)-3-azabicyclo[4.1.0]heptan-5-one (2d)**

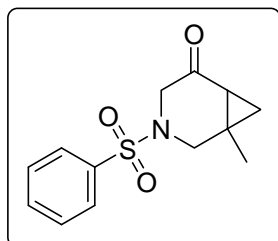

$^1H$  NMR (400 MHz,  $CDCl_3$ )  $\delta$  7.76 (d,  $J = 8.8$  Hz, 2H), 7.66 - 7.62 (m, 1H), 7.59 - 7.55 (m, 2H), 4.13 (d,  $J = 18.0$  Hz, 1H), 4.01 (d,  $J = 12.0$  Hz, 1H), 2.89 (d,  $J = 18.0$  Hz, 1H), 2.62 (d,  $J = 12.0$  Hz, 1H), 1.98 (t,  $J = 4.8$  Hz, 1H), 1.71 (dd,  $J = 10.0$  Hz, 5.2 Hz, 1H), 1.25 (s, 3H), 1.13 (dd,  $J = 10.0$  Hz, 5.2 Hz, 1H);  $^{13}C$  NMR (100 MHz,  $CDCl_3$ )  $\delta$  201.0, 135.5, 133.3, 129.3, 127.5, 127.4, 52.4, 47.5, 33.4, 24.3, 20.4, 18.2; LRMS (EI, 70 eV)  $m/z$  (%): 265 ( $M^+$ , 2), 141 (6), 124 (100), 95 (21); HRMS (ESI): calculated for  $[C_{13}H_{16}NO_3S^+]$  266.0845, found 266.0857.

**1-Methyl-6-(*p*-tolyl)-3-tosyl-3-azabicyclo[4.1.0]heptan-5-one (2e)**

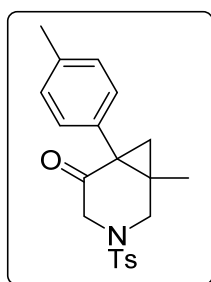

$^1H$  NMR (400 MHz,  $CDCl_3$ )  $\delta$  7.67 (d,  $J = 8.0$  Hz, 2H), 7.37 (d,  $J = 8.0$  Hz, 2H), 7.11 (d,  $J = 7.6$  Hz, 2H), 6.93 (d,  $J = 7.6$  Hz, 2H), 4.25 (d,  $J = 18.0$  Hz, 1H), 4.08 (d,  $J = 12.0$  Hz, 1H), 3.05 (d,  $J = 18.0$  Hz, 1H), 2.77 (d,  $J = 12.0$  Hz, 1H), 2.46 - 2.45 (m, 4H), 2.31 (s, 3H), 1.55 (d,  $J = 5.2$  Hz, 1H), 0.97 (s, 3H);  $^{13}C$  NMR (100 MHz,  $CDCl_3$ )  $\delta$  201.1, 144.3, 137.3, 132.3, 132.1, 130.5, 130.0, 129.1, 127.6, 53.1, 48.5, 44.9, 29.8, 22.2, 21.5, 21.1, 18.4; LRMS (EI, 70 eV)  $m/z$  (%): 306 ( $M^+$ , 100), 274 (30), 247 (99), 219 (62); HRMS (ESI): calculated for  $[C_{21}H_{24}NO_3S^+]$  370.1471, found 370.1485.

**6-(4-Methoxyphenyl)-1-methyl-3-tosyl-3-azabicyclo[4.1.0]heptan-5-one (2f)**

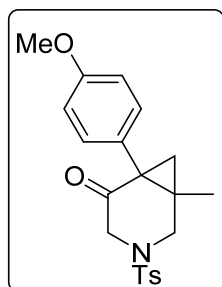

$^1\text{H}$  NMR (400 MHz,  $\text{CDCl}_3$ )  $\delta$  7.67 (d,  $J = 7.2$  Hz, 2H), 7.37 (d,  $J = 7.6$  Hz, 2H), 6.96 (d,  $J = 8.0$  Hz, 2H), 6.84 (d,  $J = 8.0$  Hz, 2H), 4.24 (d,  $J = 18.0$  Hz, 1H), 4.07 (d,  $J = 12.0$  Hz, 1H), 3.77 (s, 3H), 3.05 (d,  $J = 18.0$  Hz, 1H), 2.77 (d,  $J = 11.9$  Hz, 1H), 2.48 - 2.46 (m, 4H), 1.53 (d,  $J = 4.8$  Hz, 1H), 0.98 (s, 3H);  $^{13}\text{C}$  NMR (100 MHz,  $\text{CDCl}_3$ )  $\delta$  201.2, 158.9, 144.3, 132.3, 131.7, 130.0, 127.6, 127.2, 113.8, 55.1, 53.1, 48.4, 44.6, 29.9, 22.4, 21.5, 18.4; LRMS (EI, 70 eV)  $m/z$  (%): 385 ( $\text{M}^+$ , 35), 343 (8), 230 (56), 174 (100); HRMS (ESI): calculated for  $[\text{C}_{21}\text{H}_{24}\text{NO}_4\text{S}^+]$  386.1421, found 386.1430.

**6-(4-Chlorophenyl)-1-methyl-3-tosyl-3-azabicyclo[4.1.0]heptan-5-one (2g)**

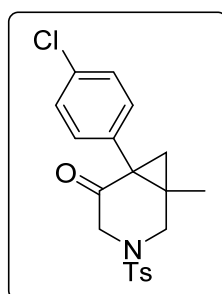

$^1\text{H}$  NMR (400 MHz,  $\text{CDCl}_3$ )  $\delta$  7.67 (d,  $J = 7.2$  Hz, 2H), 7.38 (d,  $J = 7.2$  Hz, 2H), 7.28 (d,  $J = 7.2$  Hz, 2H), 6.99 (d,  $J = 7.2$  Hz, 2H), 4.25 (d,  $J = 18.0$  Hz, 1H), 4.08 (d,  $J = 12.0$  Hz, 1H), 3.06 (d,  $J = 18.0$  Hz, 1H), 2.78 (d,  $J = 12.0$  Hz, 1H), 2.48 - 2.46 (m, 4H), 1.54 (s, 1H), 0.97 (s, 3H);  $^{13}\text{C}$  NMR (100 MHz,  $\text{CDCl}_3$ )  $\delta$  200.5, 144.4, 133.8, 133.6, 132.2, 132.0, 130.0, 128.6, 127.6, 53.1, 48.3, 44.6, 30.0, 22.3, 21.5, 18.4; LRMS (EI, 70 eV)  $m/z$  (%): 391 ( $\text{M}^+ + 2$ , 10), 389 ( $\text{M}^+$ , 25), 347 (28), 234 (100), 143 (69); HRMS (ESI): calculated for  $[\text{C}_{20}\text{H}_{21}^{35}\text{ClNO}_3\text{S}^+]$  390.0925, found 390.0933.

**4-(1-Methyl-5-oxo-3-tosyl-3-azabicyclo[4.1.0]heptan-6-yl)benzotrile (2h)**

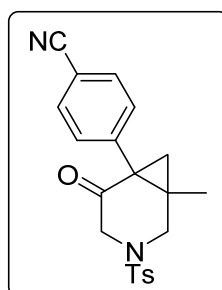

$^1\text{H}$  NMR (400 MHz,  $\text{CDCl}_3$ )  $\delta$  7.68 (d,  $J = 8.0$  Hz, 2H), 7.61

---

(d,  $J = 8.4$  Hz, 2H), 7.39 (d,  $J = 8.0$  Hz, 2H), 7.17 (d,  $J = 8.0$  Hz, 2H), 4.27 (d,  $J = 18.0$  Hz, 1H), 4.10 (d,  $J = 12.0$  Hz, 1H), 3.08 (d,  $J = 18.0$  Hz, 1H), 2.80 (d,  $J = 12.0$  Hz, 1H), 2.55 (d,  $J = 5.6$  Hz, 1H), 2.47 (s, 3H), 1.58 (d,  $J = 5.6$  Hz, 1H), 0.97 (s, 3H);  $^{13}\text{C}$  NMR (100 MHz,  $\text{CDCl}_3$ )  $\delta$  199.9, 144.5, 140.9, 132.4, 132.2, 131.6, 130.1, 127.6, 118.5, 111.7, 53.1, 48.3, 45.1, 30.4, 22.2, 21.6, 18.4; HRMS (ESI): calculated for  $[\text{C}_{21}\text{H}_{21}\text{N}_2\text{O}_3\text{S}^+]$  381.1267, found 381.1280.

### 1-Methyl-6-(*o*-tolyl)-3-tosyl-3-azabicyclo[4.1.0]heptan-5-one (2i)

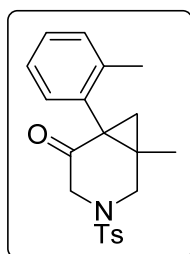

$^1\text{H}$  NMR (400 MHz,  $\text{CDCl}_3$ )  $\delta$  7.68 (d,  $J = 7.2$  Hz, 2H), 7.38 (d,  $J = 7.6$  Hz, 2H), 7.19 - 7.13 (m, 4H), 4.27 (d,  $J = 17.6$  Hz, 1H), 4.12 (d,  $J = 12.0$  Hz, 1H), 3.05 (d,  $J = 18.0$  Hz, 1H), 2.81 (d,  $J = 12.0$  Hz, 1H), 2.47 (s, 3H), 2.39 (d,  $J = 4.8$  Hz, 1H), 1.96 (s, 3H), 1.59 (d,  $J = 4.8$  Hz, 1H), 0.93 (s, 3H);  $^{13}\text{C}$  NMR (100 MHz,  $\text{CDCl}_3$ )  $\delta$  199.9, 144.3, 137.8, 134.2, 132.5, 130.9, 130.0, 127.8, 127.5, 126.2, 52.7, 48.1, 44.3, 29.3, 21.6, 21.1, 19.7, 16.6; LRMS (EI, 70 eV)  $m/z$  (%): 369 ( $\text{M}^+$ , 10), 327 (3), 214 (100), 186 (26); HRMS (ESI): calculated for  $[\text{C}_{21}\text{H}_{24}\text{NO}_3\text{S}^+]$  370.1471, found 370.1479.

### 6-(3-Bromophenyl)-1-methyl-3-tosyl-3-azabicyclo[4.1.0]heptan-5-one (2j)

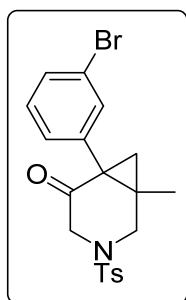

$^1\text{H}$  NMR (400 MHz,  $\text{CDCl}_3$ )  $\delta$  7.67 (d,  $J = 8.0$  Hz, 2H), 7.42 - 7.37 (m, 3H), 7.20 - 7.16 (m, 2H), 6.98 (d,  $J = 7.8$  Hz, 1H), 4.25 (d,  $J = 18.0$  Hz, 1H), 4.08 (d,  $J = 12.0$  Hz, 1H), 3.05 (d,  $J = 18.0$  Hz, 1H), 2.77 (d,  $J = 12.0$  Hz, 1H), 2.48 - 2.46 (m, 4H), 1.55 (d,  $J = 5.6$  Hz,

---

1H), 0.98 (s, 3H); <sup>13</sup>C NMR (100 MHz, CDCl<sub>3</sub>) δ 200.3, 144.4, 137.6, 133.7, 132.2, 130.8, 130.0, 129.9, 129.4, 127.6, 122.4, 53.1, 48.3, 44.8, 30.0, 22.1, 21.6, 18.4; LRMS (EI, 70 eV) *m/z* (%): 435 (M<sup>+</sup>+2, 15), 433 (16), 393 (17), 278 (64), 135 (100); HRMS (ESI): calculated for [C<sub>20</sub>H<sub>21</sub><sup>79</sup>BrNO<sub>3</sub>S<sup>+</sup>] 434.0420, found 434.0435.

**Methyl 3-methyl-4-(1-methyl-5-oxo-3-tosyl-3-azabicyclo[4.1.0]heptan-6-yl)-benzoate (2k)**

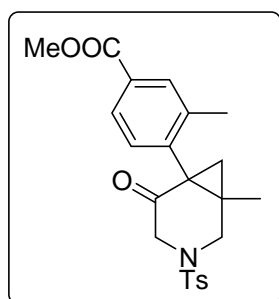

<sup>1</sup>H NMR (400 MHz, CDCl<sub>3</sub>) δ 7.85 - 7.83 (m, 2H), 7.68 (d, *J* = 8.4 Hz, 2H), 7.39 (d, *J* = 8.4 Hz, 2H), 7.21 (d, *J* = 8.0 Hz, 1H), 4.28 (d, *J* = 18.0 Hz, 1H), 4.13 (d, *J* = 12.0 Hz, 1H), 3.89 (s, 3H), 3.05 (d, *J* = 18.0 Hz, 1H), 2.81 (d, *J* = 12.0 Hz, 1H), 2.47 (s, 3H), 2.44 (d, *J* = 5.6 Hz, 1H), 2.01 (s, 3H), 1.61 (d, *J* = 5.6 Hz, 1H), 0.92 (s, 3H); <sup>13</sup>C NMR (100 MHz, CDCl<sub>3</sub>) δ 199.3, 166.8, 144.4, 139.7, 138.3, 132.5, 131.2, 131.1, 130.1, 129.6, 127.5, 127.4, 52.7, 52.1, 48.0, 44.2, 29.6, 21.6, 21.3, 19.7, 16.6; LRMS (EI, 70 eV) *m/z* (%): 427 (M<sup>+</sup>, 11), 396 (5), 272 (100), 244 (21); HRMS (ESI): calculated for [C<sub>23</sub>H<sub>26</sub>NO<sub>5</sub>S<sup>+</sup>] 428.1526, found 428.1536.

**1-Methyl-6-(thiophen-2-yl)-3-tosyl-3-azabicyclo[4.1.0]heptan-5-one (2l)**

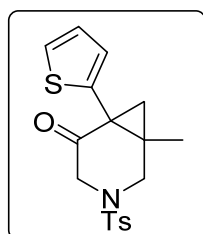

<sup>1</sup>H NMR (400 MHz, CDCl<sub>3</sub>) δ 7.67 (d, *J* = 7.2 Hz, 2H), 7.38 (d, *J* = 6.8 Hz, 2H), 7.25 (d, *J* = 6.8 Hz, 1H), 6.97 - 6.96 (m, 1H), 6.79 (m, 1H), 4.26 (d, *J* = 18.0 Hz, 1H), 4.08 (d, *J* = 12.0 Hz, 1H), 3.08 (d, *J* = 18.0 Hz, 1H), 2.78 (d, *J* = 12.0 Hz, 1H), 2.60 (d, *J* = 4.4 Hz, 1H), 2.46 (s, 3H),

---

1.70 (d,  $J = 4.4$  Hz, 1H), 1.07 (s, 3H);  $^{13}\text{C}$  NMR (100 MHz,  $\text{CDCl}_3$ )  $\delta$  199.6, 144.4, 137.9, 132.3, 130.0, 128.7, 127.6, 126.6, 126.0, 53.1, 48.2, 39.9, 31.6, 24.7, 21.6, 17.9; LRMS (EI, 70 eV)  $m/z$  (%): 361 ( $\text{M}^+$ , 24), 319 (18), 206 (65), 150 (100); HRMS (ESI): calculated for  $[\text{C}_{18}\text{H}_{20}\text{NO}_3\text{S}_2^+]$  362.0879, found 362.0890.

### 1-Methyl-3-tosyl-3-azabicyclo[4.1.0]heptan-5-one (2m)

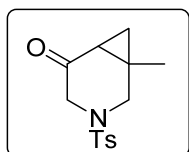

$^1\text{H}$  NMR (400 MHz,  $\text{CDCl}_3$ )  $\delta$  7.64 (d,  $J = 8.0$  Hz, 2H), 7.35 (d,  $J = 8.0$  Hz, 2H), 4.11 (d,  $J = 18.0$  Hz, 1H), 3.98 (d,  $J = 12.0$  Hz, 1H), 2.87 (d,  $J = 18.0$  Hz, 1H), 2.58 (d,  $J = 12.0$  Hz, 1H), 2.44 (s, 3H), 1.99 (t,  $J = 4.8$  Hz, 1H), 1.70 (dd,  $J = 10.0$  Hz, 4.8 Hz, 1H), 1.24 (s, 3H), 1.12 (dd,  $J = 10.0$  Hz, 4.8 Hz, 1H);  $^{13}\text{C}$  NMR (100 MHz,  $\text{CDCl}_3$ )  $\delta$  201.2, 144.2, 132.5, 129.9, 127.5, 52.5, 47.6, 33.4, 24.3, 21.5, 20.4, 18.2; LRMS (EI, 70 eV)  $m/z$  (%): 279 ( $\text{M}^+$ , 3), 155 (7), 124 (100), 91 (25); HRMS (ESI): calculated for  $[\text{C}_{14}\text{H}_{18}\text{NO}_3\text{S}^+]$  280.1002, found 280.1022.

### 1,6-Dimethyl-3-tosyl-3-azabicyclo[4.1.0]heptan-5-one (2n)

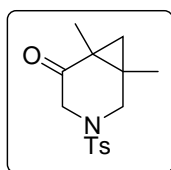

$^1\text{H}$  NMR (400 MHz,  $\text{CDCl}_3$ )  $\delta$  7.63 (d,  $J = 7.2$  Hz, 2H), 7.35 (d,  $J = 8.0$  Hz, 2H), 4.11 (d,  $J = 18.0$  Hz, 1H), 3.93 (d,  $J = 11.6$  Hz, 1H), 2.94 (d,  $J = 18.0$  Hz, 1H), 2.59 (d,  $J = 11.6$  Hz, 1H), 2.44 (s, 3H), 2.19 (d,  $J = 4.8$  Hz, 1H), 1.26 (s, 3H), 1.22 (s, 3H), 0.85 (d,  $J = 4.8$  Hz, 1H);  $^{13}\text{C}$  NMR (100 MHz,  $\text{CDCl}_3$ )  $\delta$  202.7, 144.2, 132.3, 129.9, 127.6, 52.6, 48.2, 34.8, 28.3, 24.3, 21.5, 16.6, 13.6; LRMS (EI, 70 eV)  $m/z$  (%): 293 ( $\text{M}^+$ , 5), 252 (4), 155 (12), 138

---

(100); HRMS (ESI): calculated for  $[C_{15}H_{20}NO_3S^+]$  294.1158, found 294.1170.

### 1-Methyl-6-pentyl-3-tosyl-3-azabicyclo[4.1.0]heptan-5-one (2o)

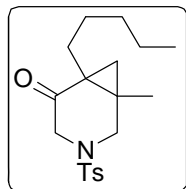

$^1H$  NMR (400 MHz,  $CDCl_3$ )  $\delta$  7.63 (d,  $J = 7.2$  Hz, 2H), 7.35 (d,  $J = 7.6$  Hz, 2H), 4.10 (d,  $J = 18.0$  Hz, 1H), 3.91 (d,  $J = 11.6$  Hz, 1H), 2.87 (d,  $J = 18.0$  Hz, 1H), 2.58 (d,  $J = 12.0$  Hz, 1H), 2.44 (s, 3H),

2.07 (d,  $J = 4.8$  Hz, 1H), 1.29 - 1.23 (m, 11H), 0.85 (m, 4H);  $^{13}C$  NMR (100 MHz,  $CDCl_3$ )  $\delta$  201.8, 144.2, 132.4, 130.0, 127.6, 53.1, 48.7, 39.4, 32.2, 29.1, 28.5, 27.1, 23.2, 22.5, 21.6, 16.9, 14.0; LRMS (EI, 70 eV)  $m/z$  (%): 349 ( $M^+$ , 2), 308 (2), 194 (100), 166 (8), 91 (18); HRMS (ESI): calculated for  $[C_{19}H_{28}NO_3S^+]$  350.1784, found 350.1794.

### 1-Phenyl-3-tosyl-3-azabicyclo[4.1.0]heptan-5-one (2q)

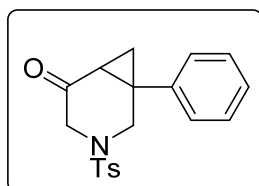

$^1H$  NMR (400 MHz,  $CDCl_3$ )  $\delta$  7.62 (d,  $J = 8.0$  Hz, 2H), 7.36 - 7.28 (m, 7H), 4.27 - 4.21 (m, 2H), 2.99 (d,  $J = 18.0$  Hz, 1H), 2.81 (d,  $J = 12.0$  Hz, 1H), 2.43 (s, 3H), 2.38 (t,  $J = 4.8$  Hz,

1H), 2.16 (dd,  $J = 10.0$  Hz, 4.8 Hz, 1H), 1.57 (dd,  $J = 10.0$  Hz, 4.8 Hz, 1H);  $^{13}C$  NMR (100 MHz,  $CDCl_3$ )  $\delta$  200.5, 144.3, 138.8, 132.5, 130.0, 128.9, 128.7, 128.2, 127.5, 52.8, 48.5, 33.1, 32.8, 21.5, 17.2; LRMS (EI, 70 eV)  $m/z$  (%): 341 ( $M^+$ , 14), 313 (3), 186 (48), 130 (100); HRMS (ESI): calculated for  $[C_{19}H_{20}NO_3S^+]$  342.1158, found 342.1170.

### 7-Methyl-6-phenyl-3-tosyl-3-azabicyclo[4.1.0]heptan-5-one (2s)

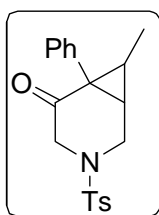

$^1\text{H}$  NMR (400 MHz,  $\text{CDCl}_3$ )  $\delta$  7.67 (d,  $J = 8.0$  Hz, 2H), 7.36 (d,  $J = 8.0$  Hz, 2H), 7.34 - 7.28 (m, 3H), 7.14 - 7.11 (m, 2H), 4.28 (dd,  $J = 12.0, 1.6$  Hz, 1H), 4.21 (d,  $J = 17.6$  Hz, 1H), 3.01 - 2.97 (m, 2H),

2.47 - 2.41 (m, 4H), 2.04 - 2.02 (m, 1H), 0.87 (d,  $J = 6.4$  Hz, 3H);  $^{13}\text{C}$  NMR (100

MHz,  $\text{CDCl}_3$ )  $\delta$  198.9, 144.3, 133.8, 132.3, 131.0, 130.0, 128.1, 127.6, 127.5, 53.0,

43.4, 43.0, 29.8, 23.0, 21.5, 14.3; LRMS (EI, 70 eV)  $m/z$  (%): 355 ( $\text{M}^+$ , 14), 341 (27),

281 (58), 253 (34), 207 (100); HRMS (ESI): calculated for  $[\text{C}_{20}\text{H}_{22}\text{NO}_3\text{S}^+]$  356.1315,

found 356.1324.

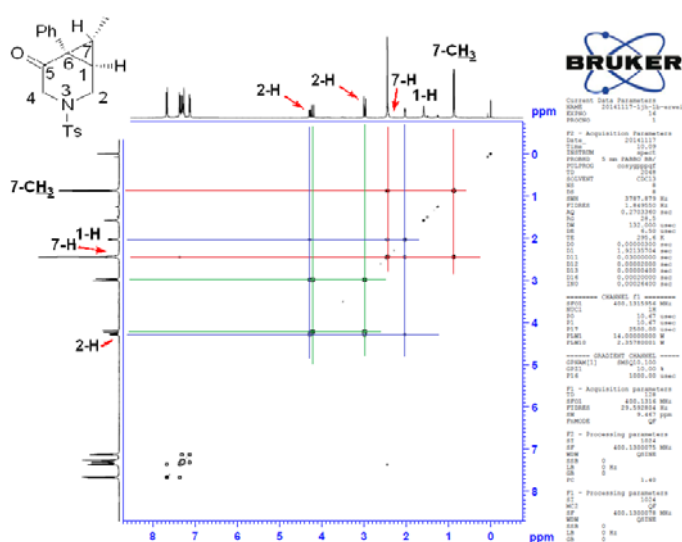

**H-H COSY**

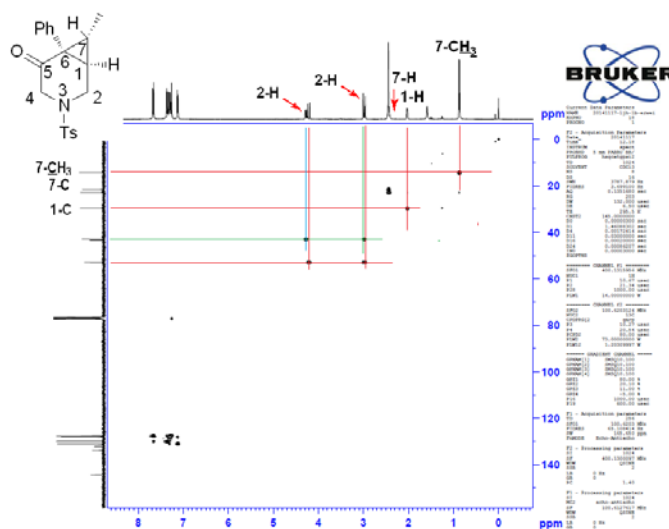

**C-H HSQC**



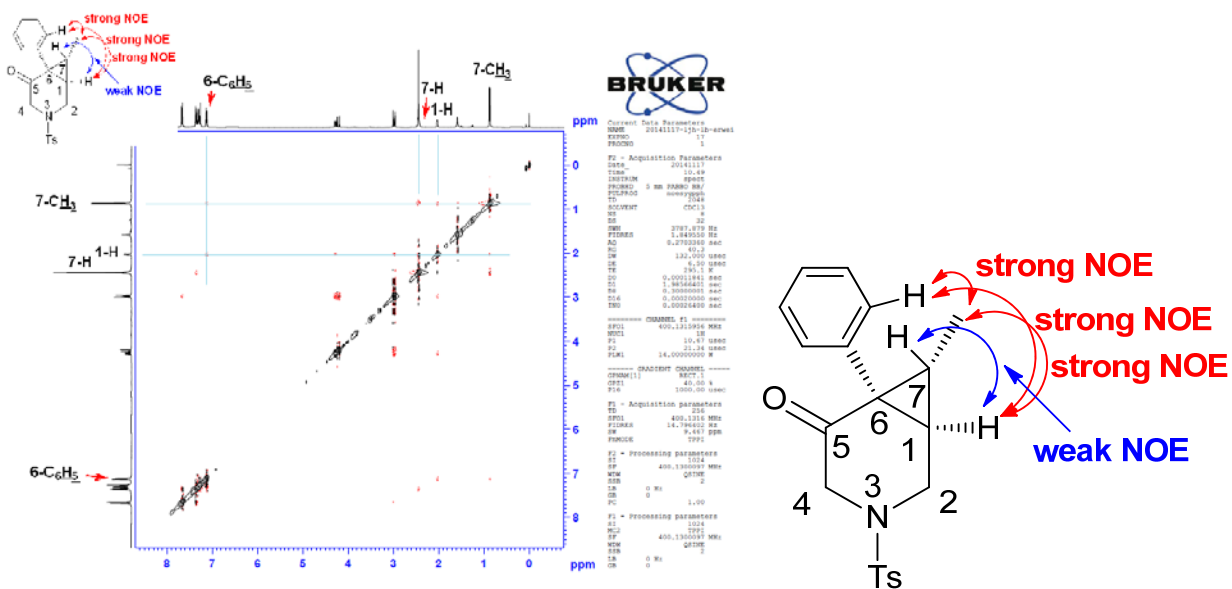

H-H Noesy

### 1-Methyl-6-phenyl-3-oxabicyclo[4.1.0]heptan-5-one (2t)

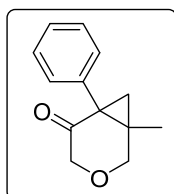

$^1\text{H}$  NMR (400 MHz,  $\text{CDCl}_3$ )  $\delta$  7.36 - 7.25 (m, 3H), 7.15 (d,  $J = 7.2$  Hz, 2H), 4.29 (d,  $J = 18.0$  Hz, 1H), 4.01 (d,  $J = 11.6$  Hz, 1H), 3.95 (d,  $J = 18.4$  Hz, 1H), 3.79 (d,  $J = 11.6$  Hz, 1H), 2.39 (d,  $J = 4.4$  Hz,

1H), 1.56 (d,  $J = 4.4$  Hz, 1H), 0.93 (s, 3H);  $^{13}\text{C}$  NMR (100 MHz,  $\text{CDCl}_3$ )  $\delta$  204.7, 135.4, 130.7, 128.3, 127.4, 72.8, 68.4, 45.8, 29.4, 21.2, 16.3; LRMS (EI, 70 eV)  $m/z$  (%): 202 ( $\text{M}^+$ , 81), 160 (41), 129 (100), 103 (52); HRMS (ESI): calculated for  $[\text{C}_{13}\text{H}_{15}\text{O}_2]^+$  203.1067, found 203.1078.

### 1,6-Diphenyl-3-oxabicyclo[4.1.0]heptan-5-one (2u)

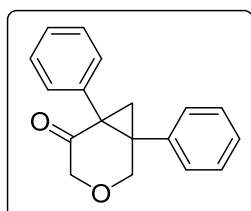

$^1\text{H}$  NMR (400 MHz,  $\text{CDCl}_3$ )  $\delta$  7.14 - 7.00 (m, 10H), 4.41

---

(d,  $J = 18.0$  Hz, 1H), 4.28 (d,  $J = 12.0$  Hz, 1H), 4.16 - 4.10 (m, 2H), 2.74 (d,  $J = 5.6$  Hz, 1H), 2.37 (d,  $J = 5.2$  Hz, 1H);  $^{13}\text{C}$  NMR (100 MHz,  $\text{CDCl}_3$ )  $\delta$  203.8, 134.8, 134.1, 130.7, 128.9, 128.2, 127.8, 127.5, 127.1, 73.1, 68.6, 47.2, 39.2, 17.9; LRMS (EI, 70 eV)  $m/z$  (%): 264 ( $\text{M}^+$ , 34), 206 (100), 160 (31), 91 (74); HRMS (ESI): calculated for  $[\text{C}_{18}\text{H}_{17}\text{O}_2^+]$  265.1223, found 265.1236.

**Methyl 7-oxo-7a-phenyl-1,2,7,7a-tetrahydro-1aH-cyclopropa[b]naphthalene-1a-carboxylate (2v)**

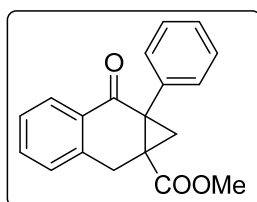

$^1\text{H}$  NMR (400 MHz,  $\text{CDCl}_3$ )  $\delta$  7.89 (d,  $J = 7.6$ , 1H), 7.51 (t,  $J = 7.6$  Hz, 1H), 7.37 - 7.22 (m, 7H), 4.08 (d,  $J = 17.6$  Hz, 1H), 3.36 (d,  $J = 17.6$  Hz, 1H), 3.30 (s, 3H), 2.59 (d,  $J = 5.6$  Hz, 1H), 1.61 (d,  $J = 5.6$  Hz, 1H);  $^{13}\text{C}$  NMR (100 MHz,  $\text{CDCl}_3$ )  $\delta$  195.1, 170.2, 137.9, 135.5, 133.4, 130.6, 130.2, 128.6, 128.2, 127.8, 127.6, 127.4, 52.1, 45.8, 33.3, 29.6, 21.6; LRMS (EI, 70 eV)  $m/z$  (%): 292 ( $\text{M}^+$ , 45), 260 (39), 233 (100), 205 (66); HRMS (ESI): calculated for  $[\text{C}_{19}\text{H}_{17}\text{O}_3^+]$  293.1172, found 293.1179.

**Methyl 7-oxo-7a-(*p*-tolyl)-1,2,7,7a-tetrahydro-1aH-cyclopropa[b]naphthalene-1a-carboxylate (2w)**

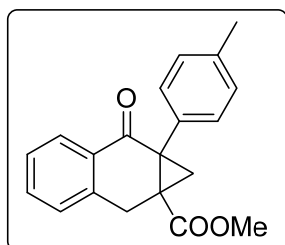

$^1\text{H}$  NMR (400 MHz,  $\text{CDCl}_3$ )  $\delta$  7.89 (d,  $J = 7.6$  Hz, 1H), 7.50 (t,  $J = 7.6$  Hz, 1H), 7.34 (t,  $J = 7.6$  Hz, 1H), 7.25 (d,  $J = 6.8$  Hz, 1H), 7.15 - 7.10 (m, 4H), 4.06 (d,  $J = 17.6$  Hz, 1H), 3.38 - 3.33 (m, 4H), 2.56 (d,  $J = 5.2$  Hz, 1H), 2.33 (s, 3H),

---

1.58 (d,  $J = 5.6$  Hz, 1H);  $^{13}\text{C}$  NMR (100 MHz,  $\text{CDCl}_3$ )  $\delta$  195.2, 170.2, 137.9, 137.2, 133.3, 132.3, 130.6, 130.0, 129.0, 128.5, 127.8, 127.4, 52.1, 45.5, 33.3, 29.6, 21.6, 21.2; LRMS (EI, 70 eV)  $m/z$  (%): 306 ( $\text{M}^+$ , 100), 274 (30), 247 (99), 219 (62); HRMS (ESI): calculated for  $[\text{C}_{20}\text{H}_{19}\text{O}_3]^+$  307.1329, found 307.1325.

**Methyl 7a-(4-chlorophenyl)-7-oxo-1,2,7,7a-tetrahydro-1aH-cyclopropa[b]-naphthalene-1a-carboxylate (2x)**

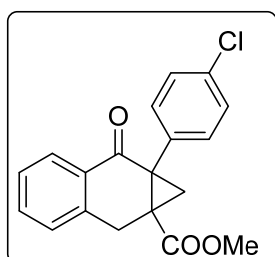

$^1\text{H}$  NMR (400 MHz,  $\text{CDCl}_3$ )  $\delta$  7.88 (d,  $J = 8.0$  Hz, 1H), 7.53 (t,  $J = 7.6$  Hz, 1H), 7.36 - 7.28 (m, 4H), 7.17 (d,  $J = 8.4$  Hz, 2H), 4.06 (d,  $J = 17.6$  Hz, 1H), 3.39 - 3.35 (m, 4H), 2.55 (d,  $J = 5.2$  Hz, 1H), 1.62 (d,  $J = 5.2$  Hz, 1H);  $^{13}\text{C}$  NMR (100 MHz,  $\text{CDCl}_3$ )  $\delta$  194.6, 169.9, 137.8, 134.1, 133.5, 131.6, 130.3, 128.6, 128.4, 127.8, 127.5, 52.2, 45.1, 33.3, 29.4, 21.6; LRMS (EI, 70 eV)  $m/z$  (%): 391 ( $\text{M}^+ + 2$ , 10), 389 ( $\text{M}^+$ , 25), 347 (28), 234 (100), 143 (69); HRMS (ESI): calculated for  $[\text{C}_{19}\text{H}_{16}^{35}\text{ClO}_3]^+$  327.0782, found 327.0796.

**Methyl 5-chloro-7-oxo-7a-phenyl-1,2,7,7a-tetrahydro-1aH-cyclopropa[b]-naphthalene-1a-carboxylate (2y)**

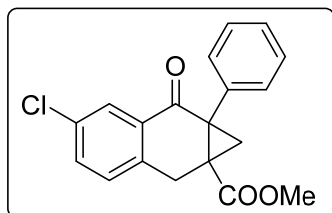

$^1\text{H}$  NMR (400 MHz,  $\text{CDCl}_3$ )  $\delta$  7.85 (d,  $J = 7.6$  Hz, 1H), 7.47 (d,  $J = 7.6$  Hz, 1H), 7.36 - 7.29 (m, 3H), 7.23 - 7.20 (m, 3H), 4.03 (d,  $J = 17.6$  Hz, 1H), 3.34 (d,  $J = 17.6$  Hz, 1H), 3.30 (s, 3H), 2.61 (d,  $J = 5.2$  Hz, 1H), 1.59 (d,  $J = 5.6$  Hz, 1H);  $^{13}\text{C}$  NMR

---

(100 MHz, CDCl<sub>3</sub>)  $\delta$  193.8, 169.8, 136.2, 135.0, 133.4, 133.3, 131.8, 130.2, 130.1, 128.2, 127.7, 127.5, 52.1, 45.6, 33.3, 29.0, 21.4; LRMS (EI, 70 eV)  $m/z$  (%): 328 (M<sup>+</sup>+2, 15), 326 (M<sup>+</sup>, 44), 294 (34), 267 (100), 203 (74); HRMS (ESI): calculated for [C<sub>19</sub>H<sub>16</sub><sup>35</sup>ClO<sub>3</sub><sup>+</sup>] 327.0782, found 327.0793.

**Methyl 7-oxo-7a-(thiophen-2-yl)-1,2,7,7a-tetrahydro-1aH-cyclopropa[b]-naphthalene-1a-carboxylate (2z)**

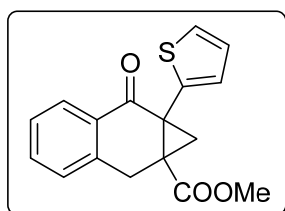

<sup>1</sup>H NMR (400 MHz, CDCl<sub>3</sub>)  $\delta$  7.90 (d,  $J$  = 7.6 Hz, 1H), 7.52 (td,  $J$  = 7.6 Hz, 1H), 7.36 (t,  $J$  = 7.6 Hz, 1H), 7.29 - 7.25 (m, 2H), 7.16 (dd,  $J$  = 2.8 Hz, 1.2 Hz, 1H), 6.96 (dd,  $J$  = 4.8, 1.2 Hz, 1H), 4.05 (d,  $J$  = 17.6 Hz, 1H), 3.40 (s, 3H), 3.34 (d,  $J$  = 17.6 Hz, 1H), 2.57 (d,  $J$  = 5.2 Hz, 1H), 1.61 (d,  $J$  = 5.6 Hz, 1H); <sup>13</sup>C NMR (100 MHz, CDCl<sub>3</sub>)  $\delta$  194.5, 169.9, 137.8, 135.4, 133.4, 130.5, 129.0, 128.6, 127.8, 127.4, 125.1, 124.9, 52.2, 40.6, 33.6, 29.5, 22.0; LRMS (EI, 70 eV)  $m/z$  (%): 298 (M<sup>+</sup>, 100), 270 (20), 239 (92), 211 (68), 178 (60); HRMS (ESI): calculated for [C<sub>17</sub>H<sub>15</sub>O<sub>3</sub>S<sup>+</sup>] 299.0736, found 299.0753.

**Methyl 5-chloro-7a-cyclopropyl-7-oxo-1,2,7,7a-tetrahydro-1aH-cyclopropa[b]-naphthalene-1a-carboxylate (2aa)**

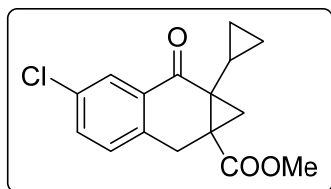

<sup>1</sup>H NMR (400 MHz, CDCl<sub>3</sub>)  $\delta$  7.80 (d,  $J$  = 2.0 Hz, 1H), 7.42 (dd,  $J$  = 8.0 Hz, 2.0 Hz, 1H), 7.14 (d,  $J$  = 8.0 Hz, 1H), 3.79 (s, 3H), 3.73 (d,  $J$  = 17.2 Hz, 1H), 3.23 (d,  $J$  = 17.2 Hz, 1H), 1.62 (d,  $J$  = 5.6 Hz, 1H), 1.23 - 1.16 (m, 1H), 1.00 (d,  $J$  = 6.0 Hz, 1H),

---

0.96 - 0.85 (m, 1H), 0.46 - 0.35 (m, 1H), 0.31 - 0.24 (m, 2H);  $^{13}\text{C}$  NMR (100 MHz,  $\text{CDCl}_3$ )  $\delta$  195.4, 170.2, 135.7, 133.4, 132.9, 132.8, 129.8, 127.2, 52.4, 40.0, 33.2, 29.9, 17.5, 8.0, 4.1, 2.3; LRMS (EI, 70 eV)  $m/z$  (%): 290 ( $\text{M}^+$ , 3), 262 (15), 231 (100), 195 (51); HRMS (ESI): calculated for  $[\text{C}_{16}\text{H}_{16}^{35}\text{ClO}_3]^+$  291.0782, found 291.0798.

**1a-Phenyl-1,1a,7,7a-tetrahydro-2H-cyclopropa[b]naphthalen-2-one (2ab)**

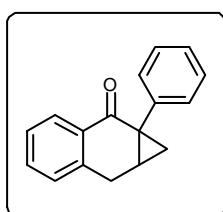

$^1\text{H}$  NMR (400 MHz,  $\text{CDCl}_3$ )  $\delta$  7.93 (d,  $J = 7.6$  Hz, 1H), 7.48 (t,  $J = 7.6$  Hz, 1H), 7.37 - 7.27 (m, 6H), 7.21 (d,  $J = 7.6$  Hz, 1H), 3.56 (dd,  $J = 17.6, 4.4$  Hz, 1H), 3.31 (d,  $J = 17.6$  Hz, 1H), 2.28-2.23 (m, 1H), 1.69 (dd,  $J = 8.0, 4.8$  Hz, 1H), 1.37 (t,  $J = 5.6$  Hz, 1H);  $^{13}\text{C}$  NMR (100 MHz,  $\text{CDCl}_3$ )  $\delta$  197.2, 139.5, 138.2, 133.0, 131.5, 130.4, 128.7, 128.3, 127.6, 127.3, 127.1, 39.3, 28.1, 22.1, 19.5; LRMS (EI, 70 eV)  $m/z$  (%): 234 ( $\text{M}^+$ , 100), 206 (84), 191 (30); HRMS (ESI): calculated for  $[\text{C}_{17}\text{H}_{15}\text{O}^+]$  235.1117, found 235.1125.

## (C) Spectra

### 1-Methyl-6-phenyl-3-tosyl-3-azabicyclo[4.1.0]heptan-5-one (2a)

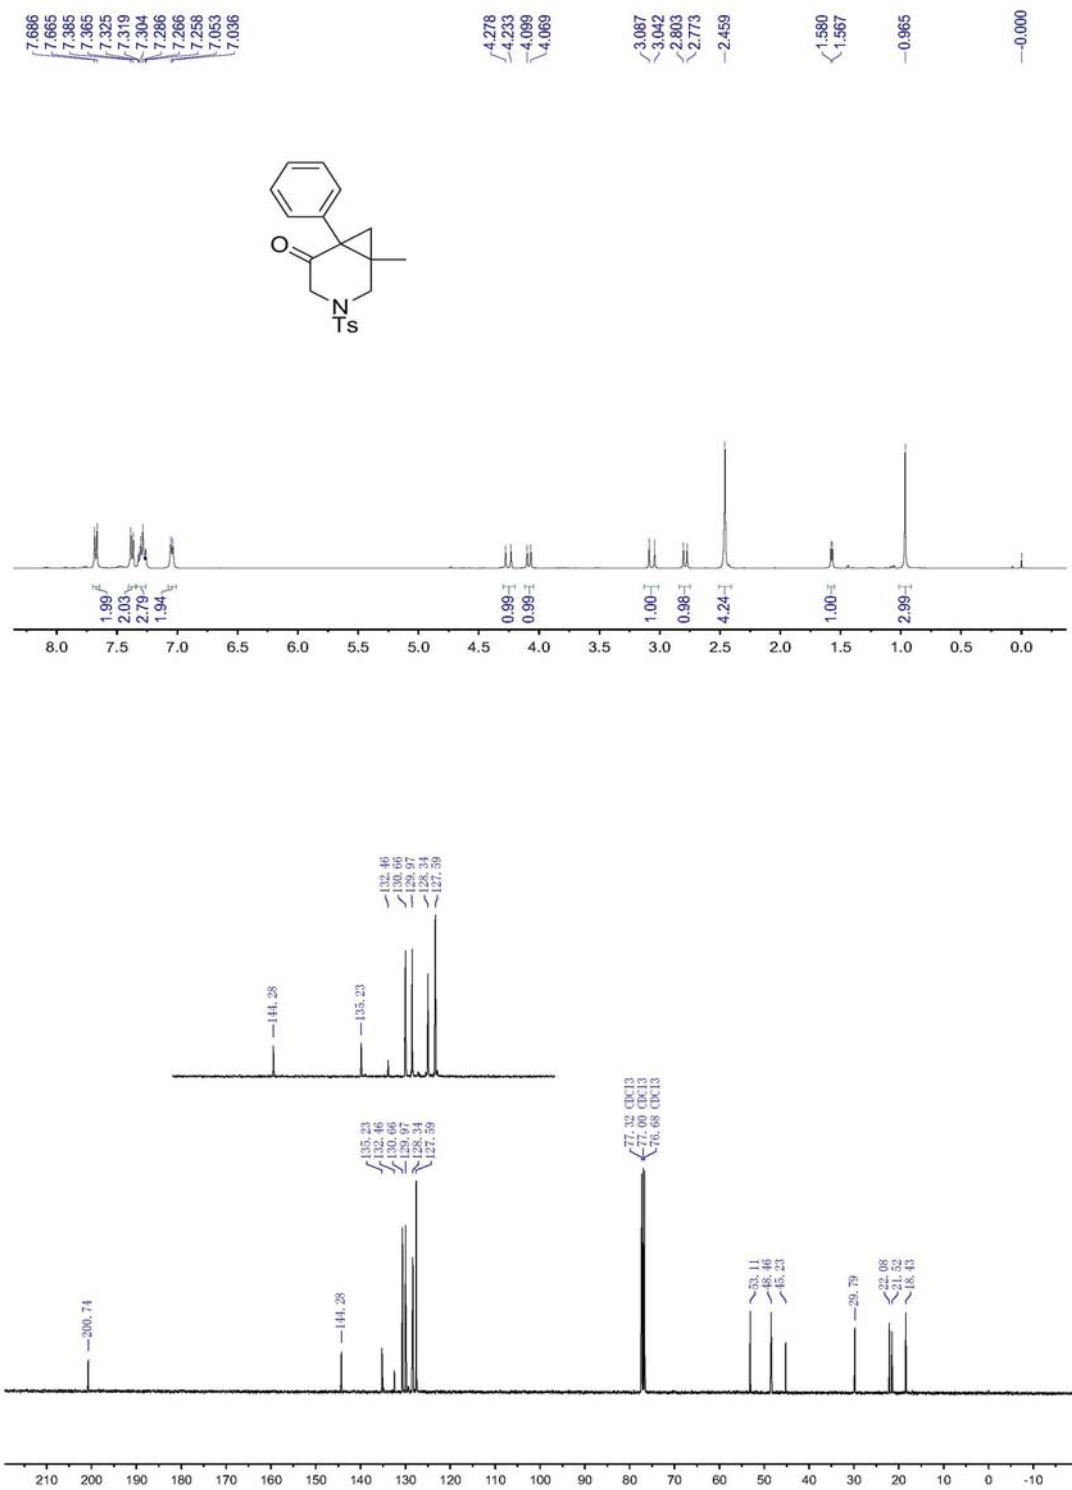

# 1-Methyl-3-(phenylsulfonyl)-3-azabicyclo[4.1.0]heptan-5-one (2d)

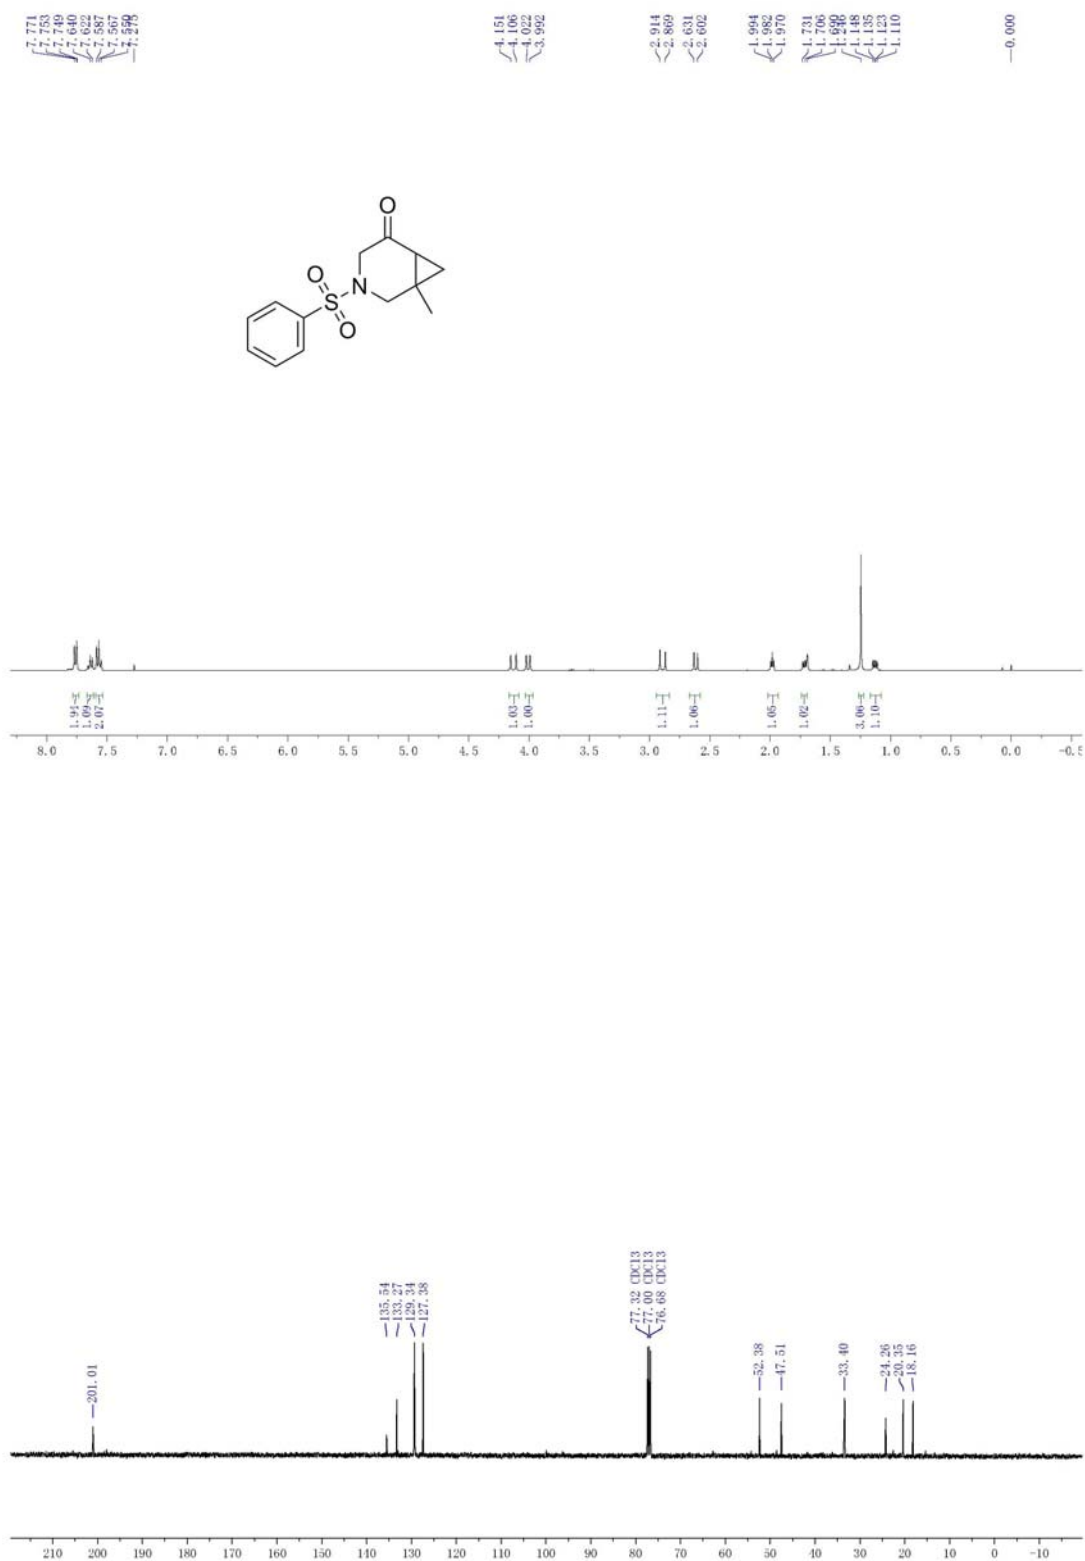

# 1-Methyl-6-(*p*-tolyl)-3-tosyl-3-azabicyclo[4.1.0]heptan-5-one (2e)

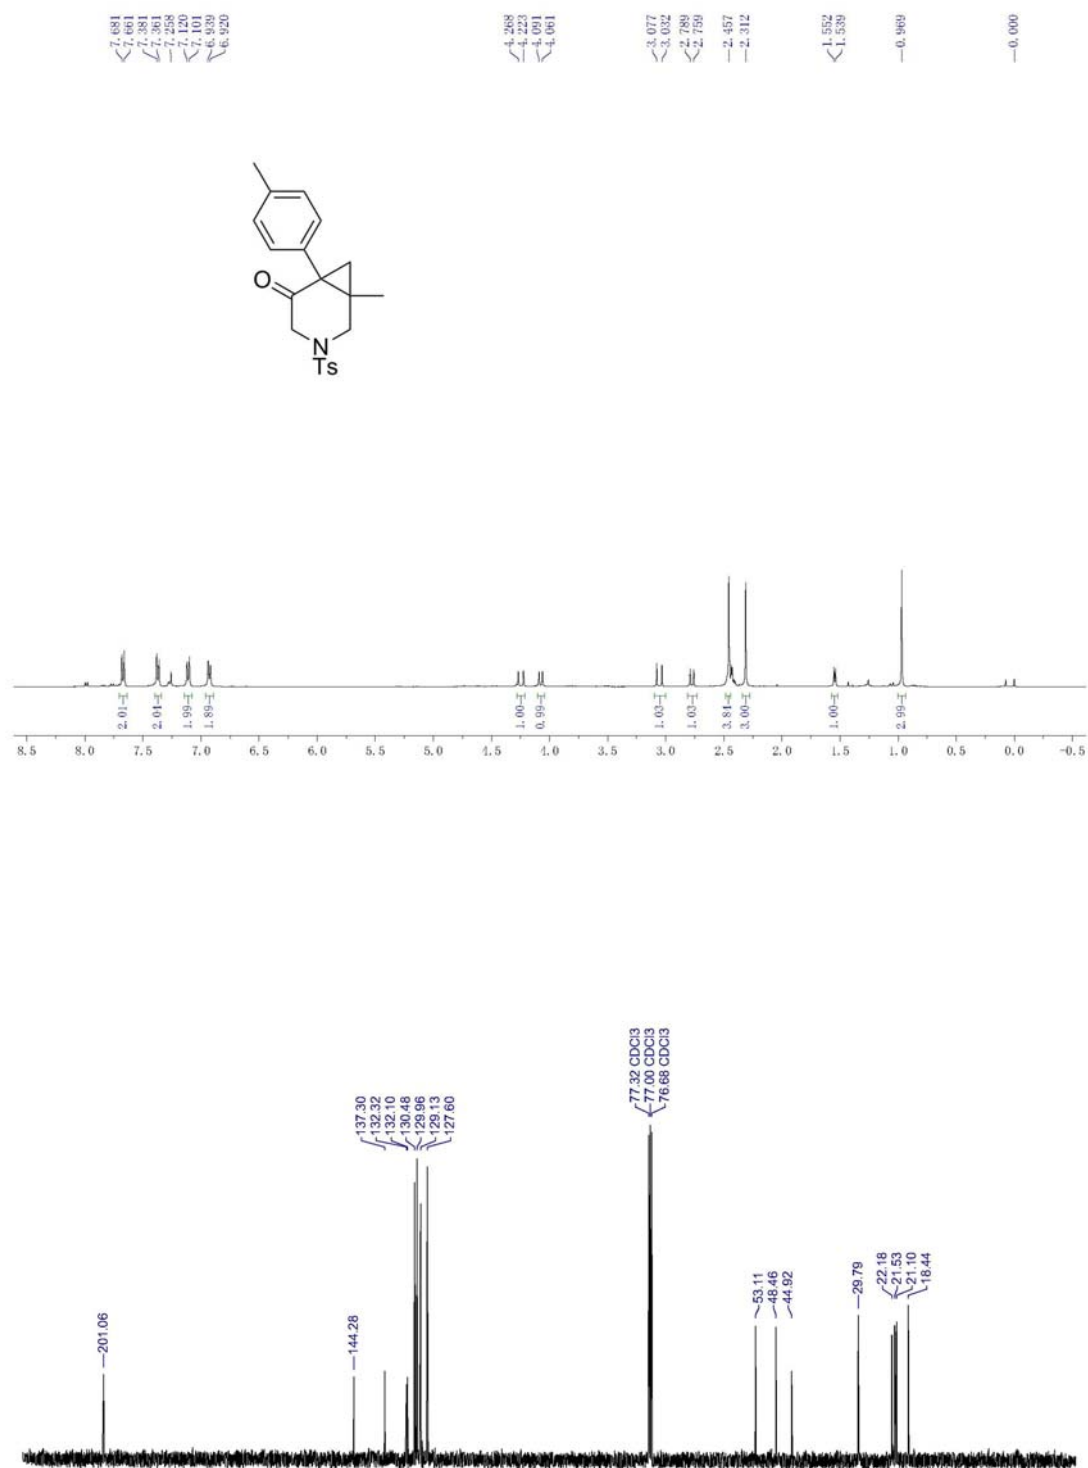



# 6-(4-Methoxyphenyl)-1-methyl-3-tosyl-3-azabicyclo[4.1.0]heptan-5-one (2f)

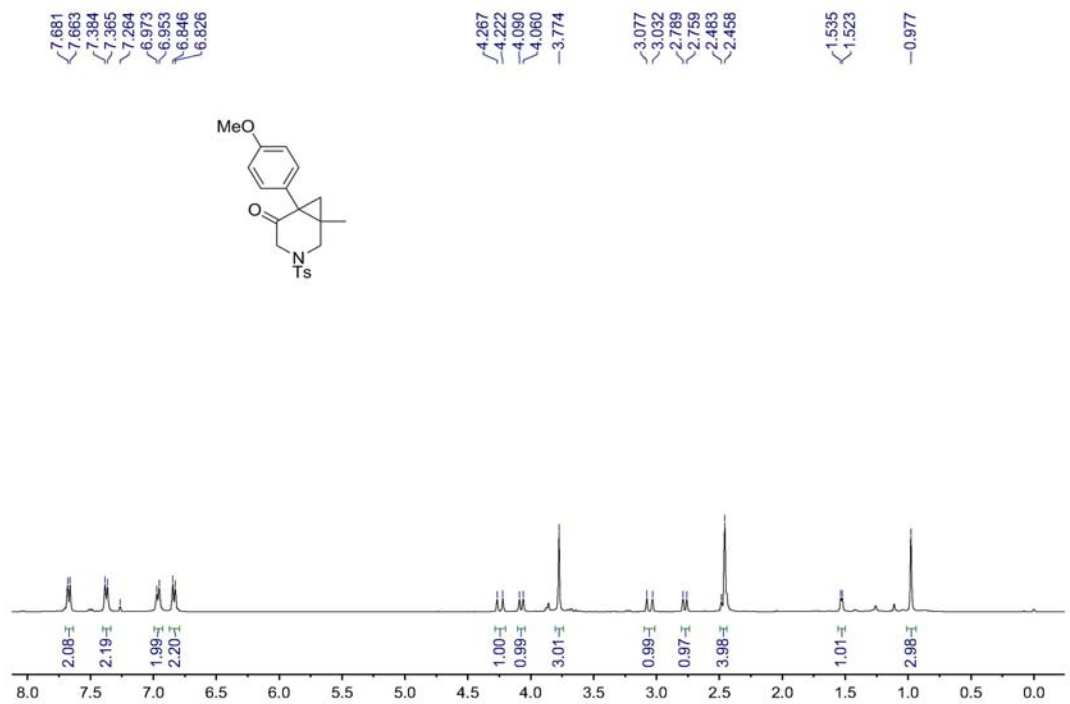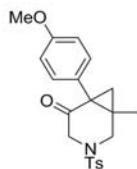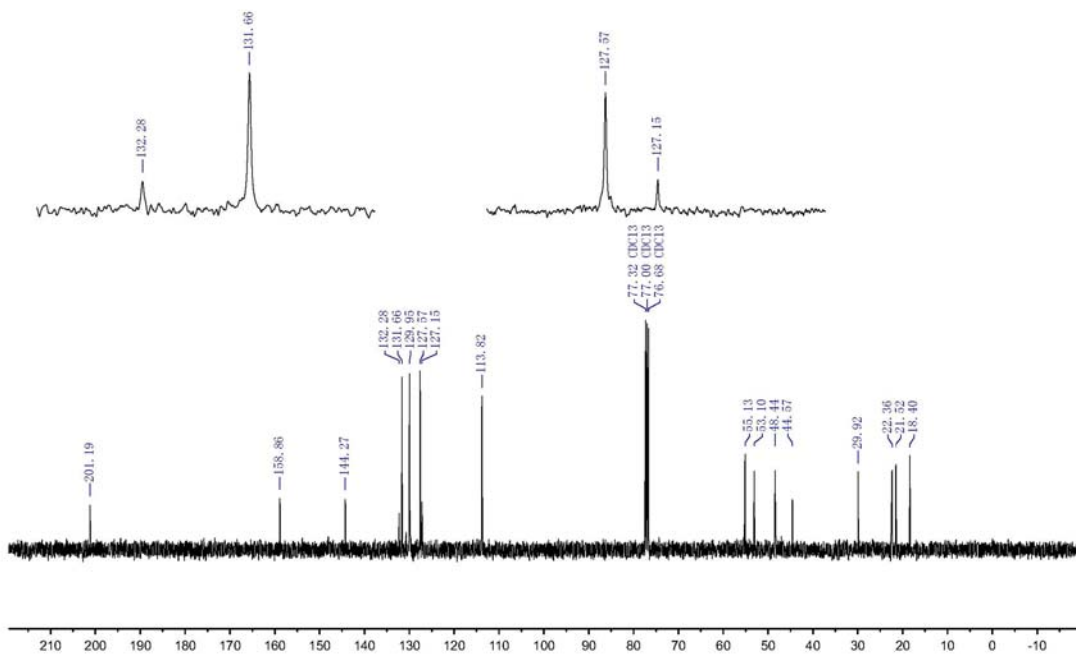

# 6-(4-Chlorophenyl)-1-methyl-3-tosyl-3-azabicyclo[4.1.0]heptan-5-one (2g)

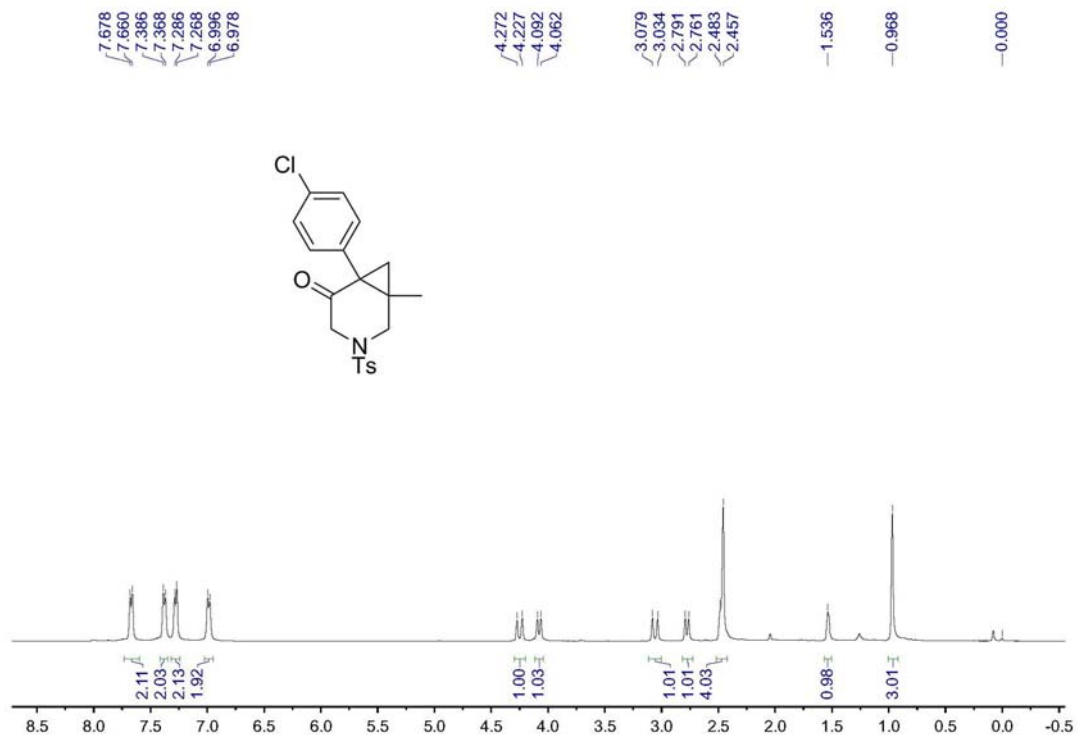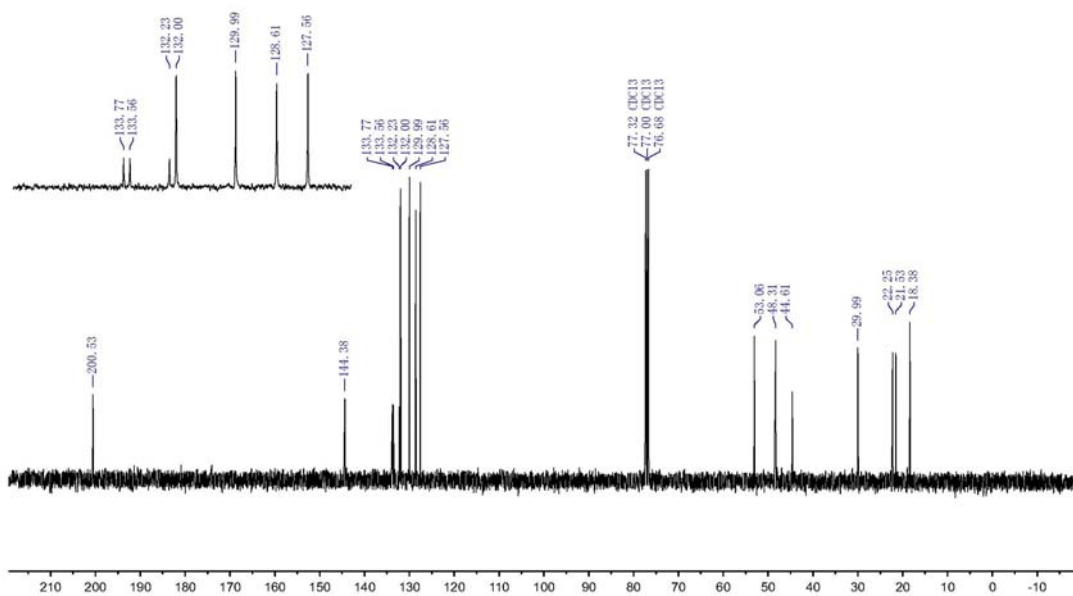

## 4-(1-Methyl-5-oxo-3-tosyl-3-azabicyclo[4.1.0]heptan-6-yl)benzonitrile (2h)

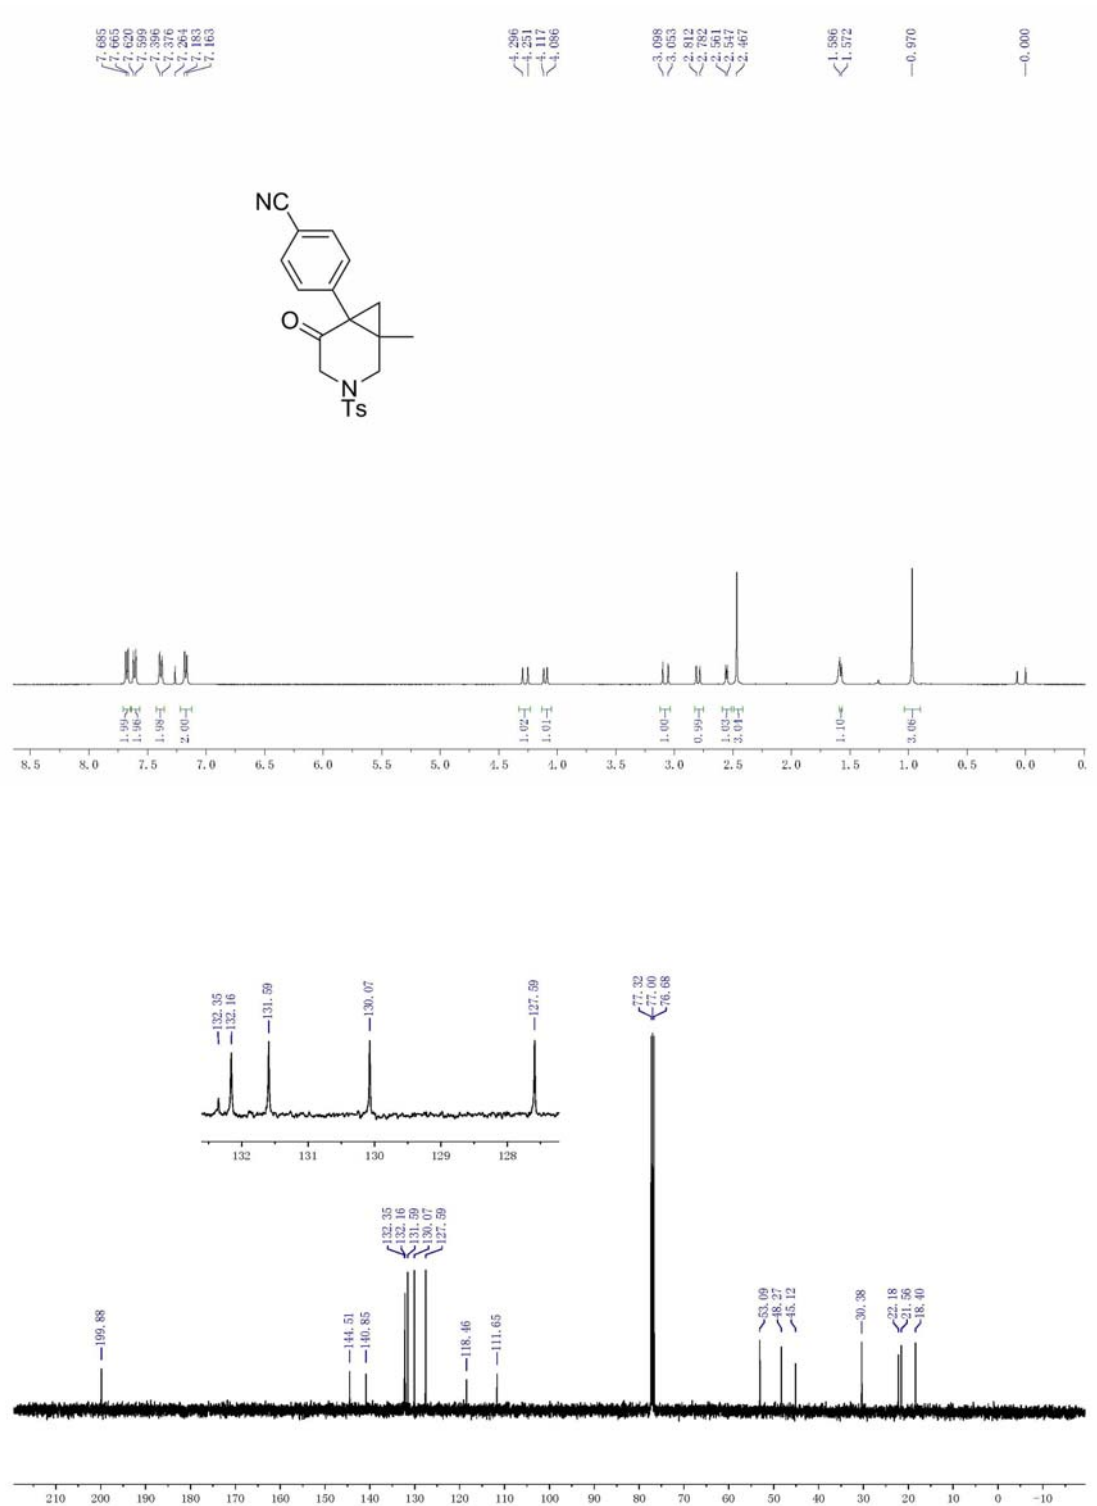

# 1-Methyl-6-(*o*-tolyl)-3-tosyl-3-azabicyclo[4.1.0]heptan-5-one (2i)

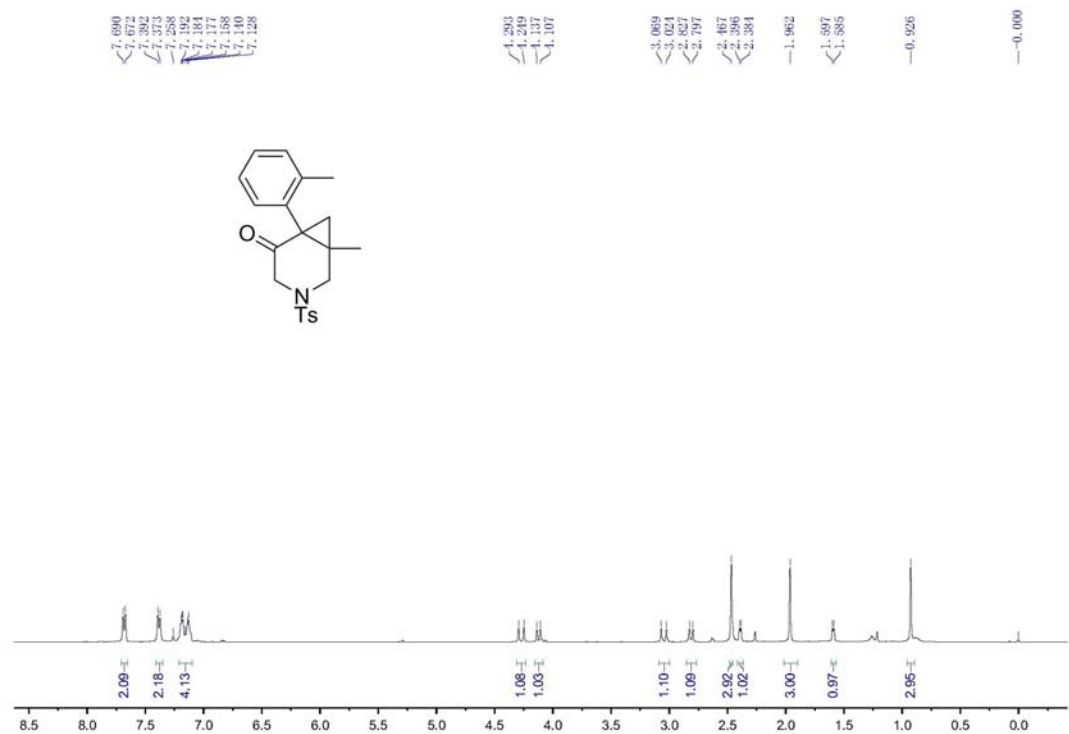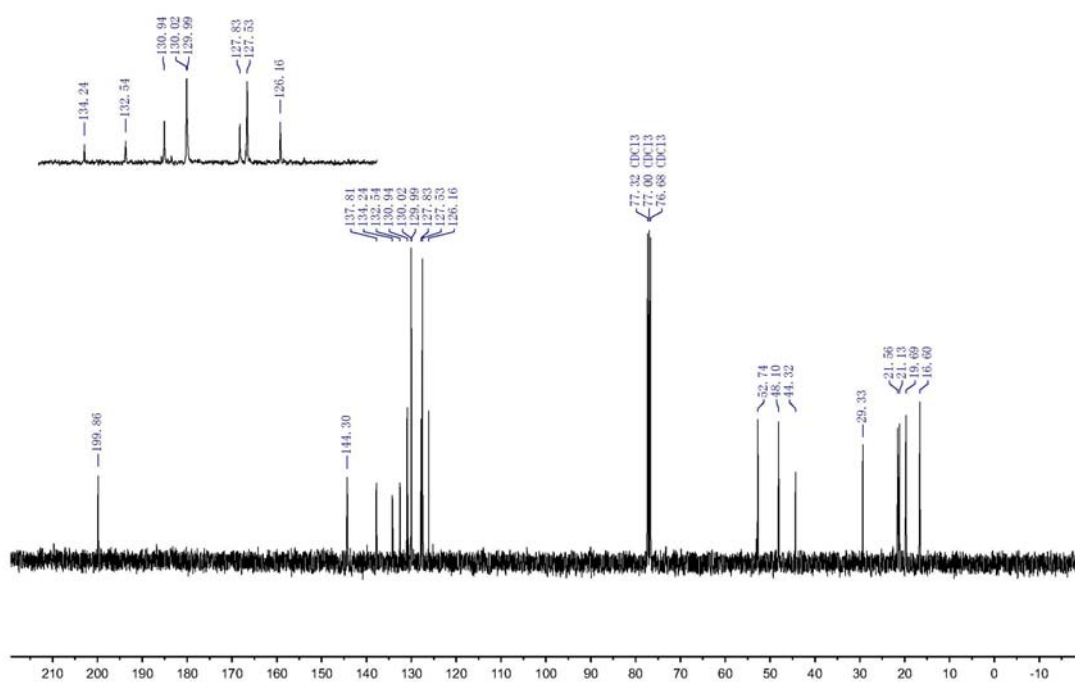

# 6-(3-Bromophenyl)-1-methyl-3-tosyl-3-azabicyclo[4.1.0]heptan-5-one (2j)

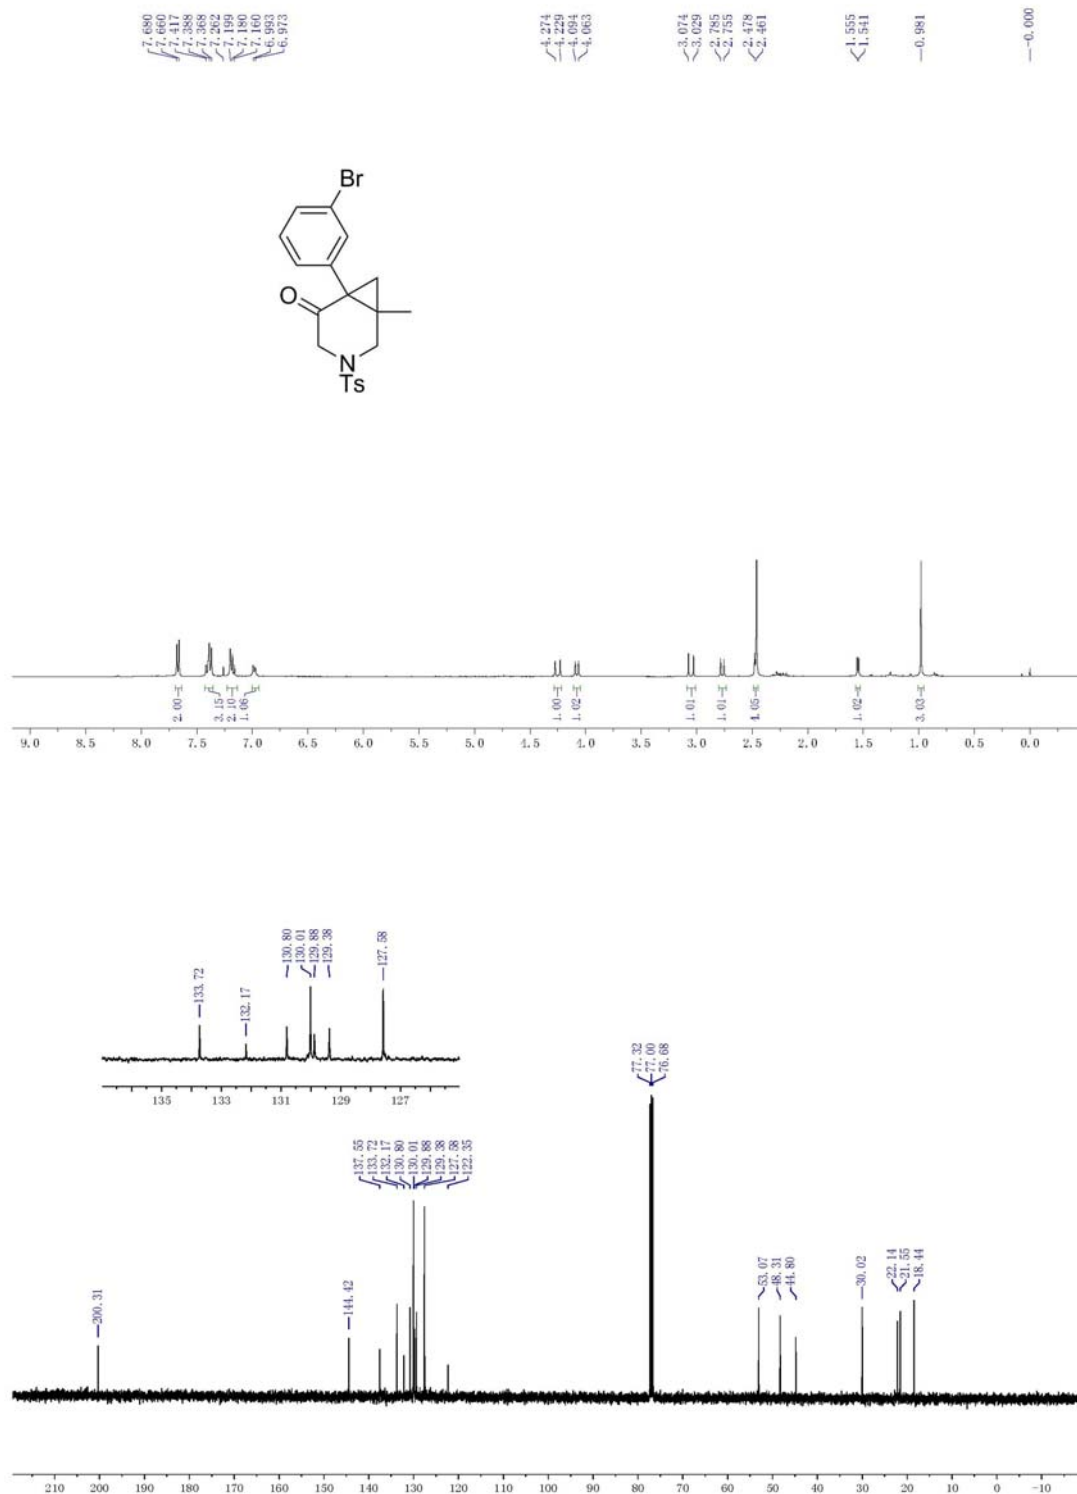

Methyl 3-methyl-4-(1-methyl-5-oxo-3-tosyl-3-azabicyclo[4.1.0]heptan-6-yl)benzoate (2k)

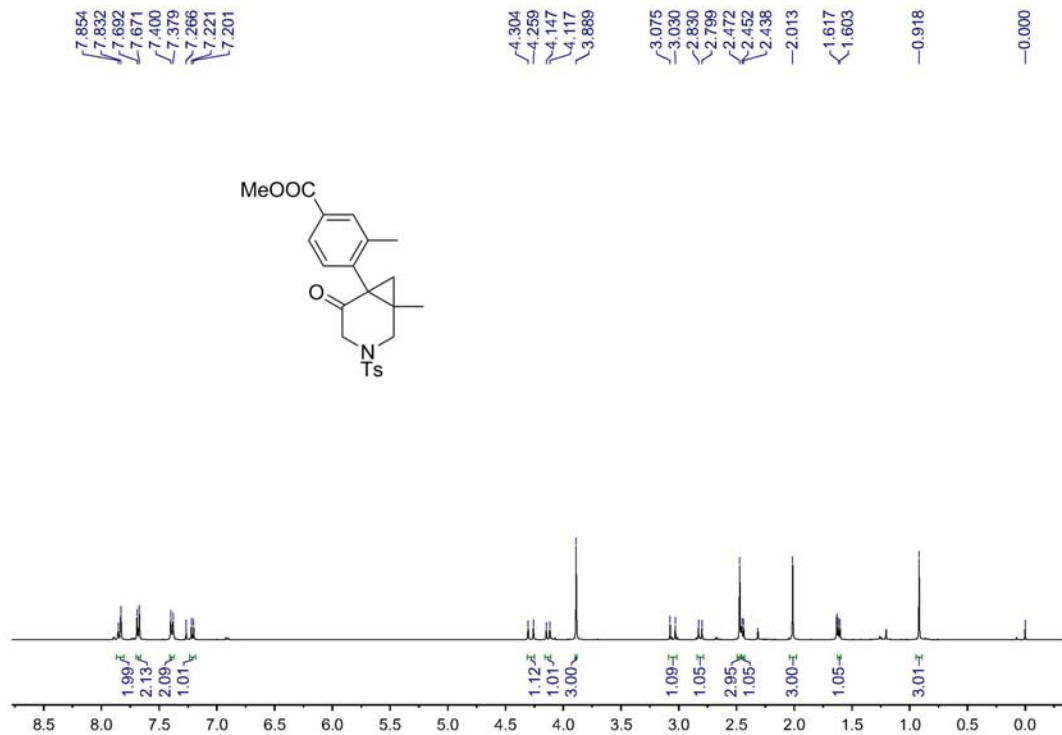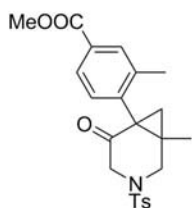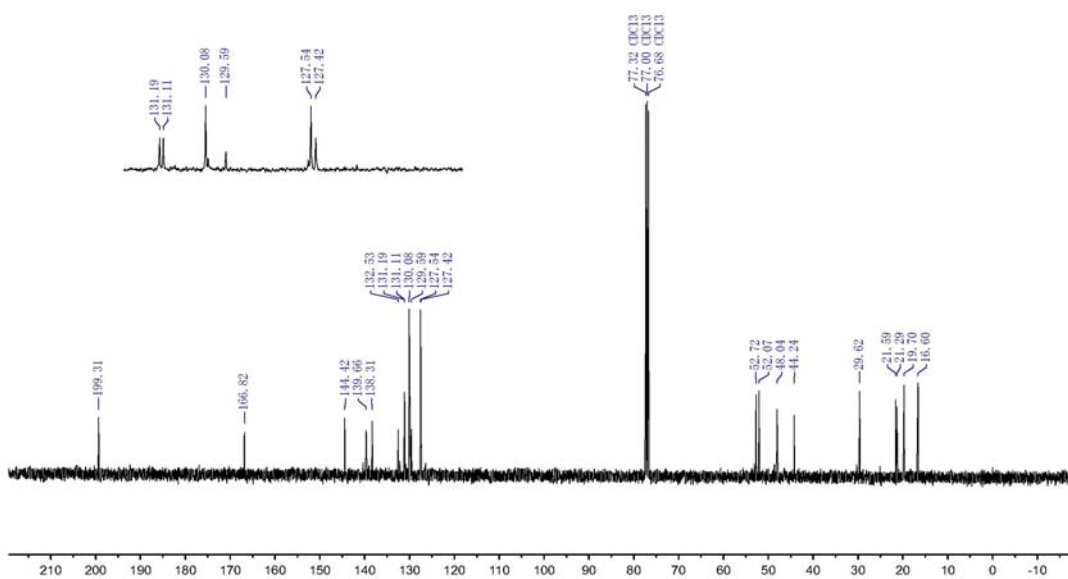

# 1-Methyl-6-(thiophen-2-yl)-3-tosyl-3-azabicyclo[4.1.0]heptan-5-one (2l)

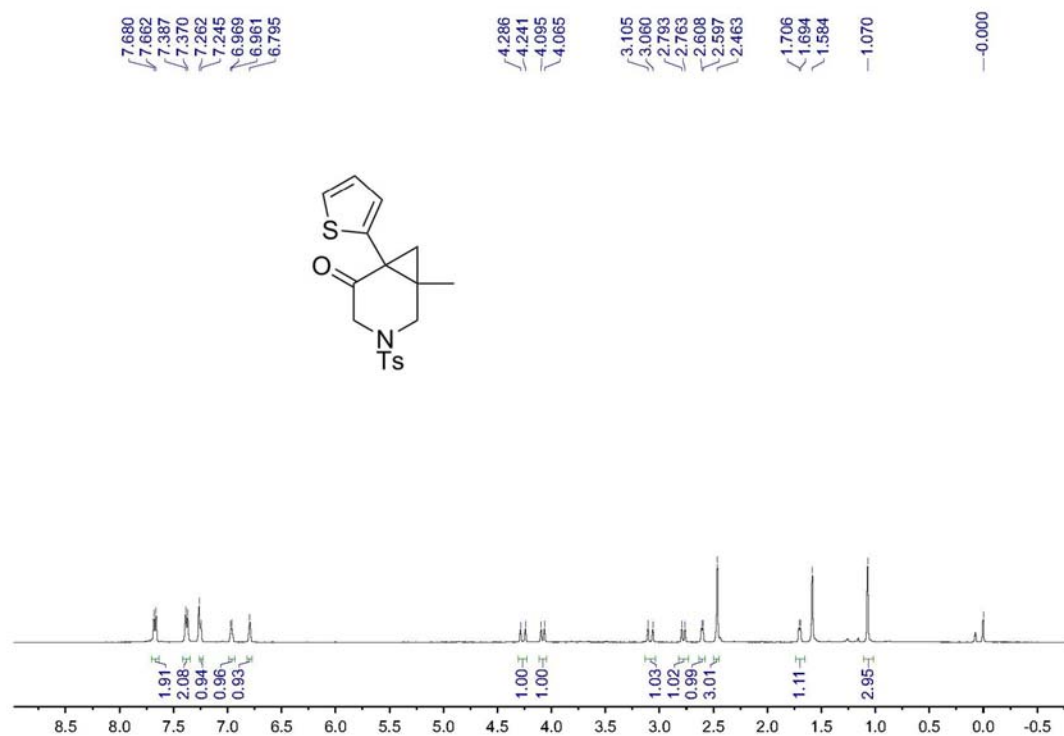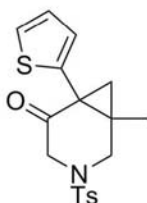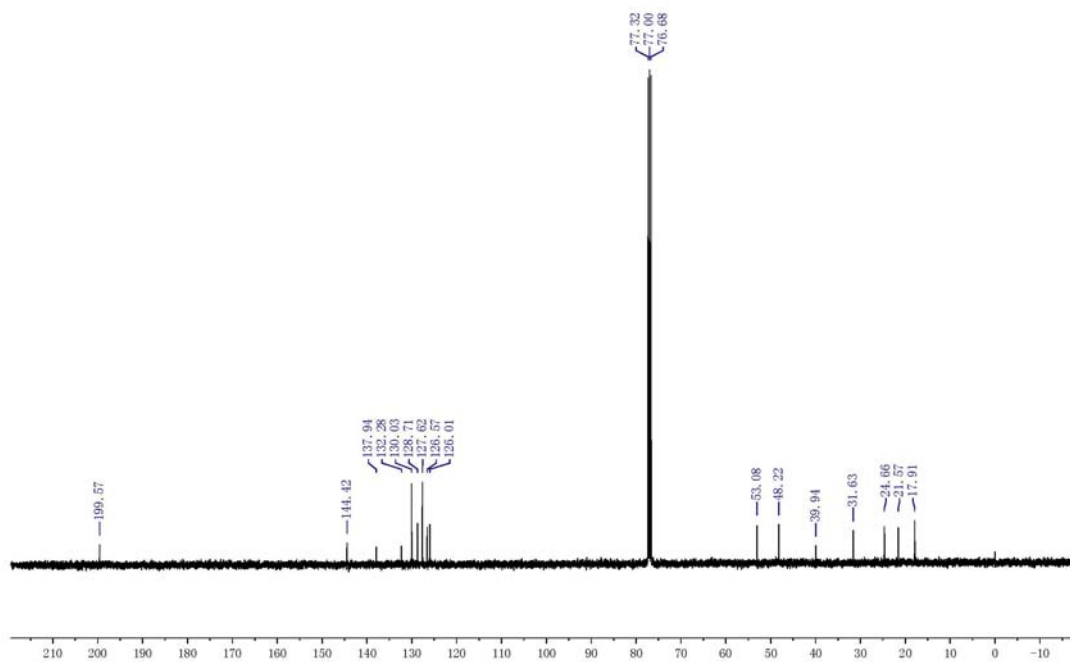

# 1-Methyl-3-tosyl-3-azabicyclo[4.1.0]heptan-5-one (2m)

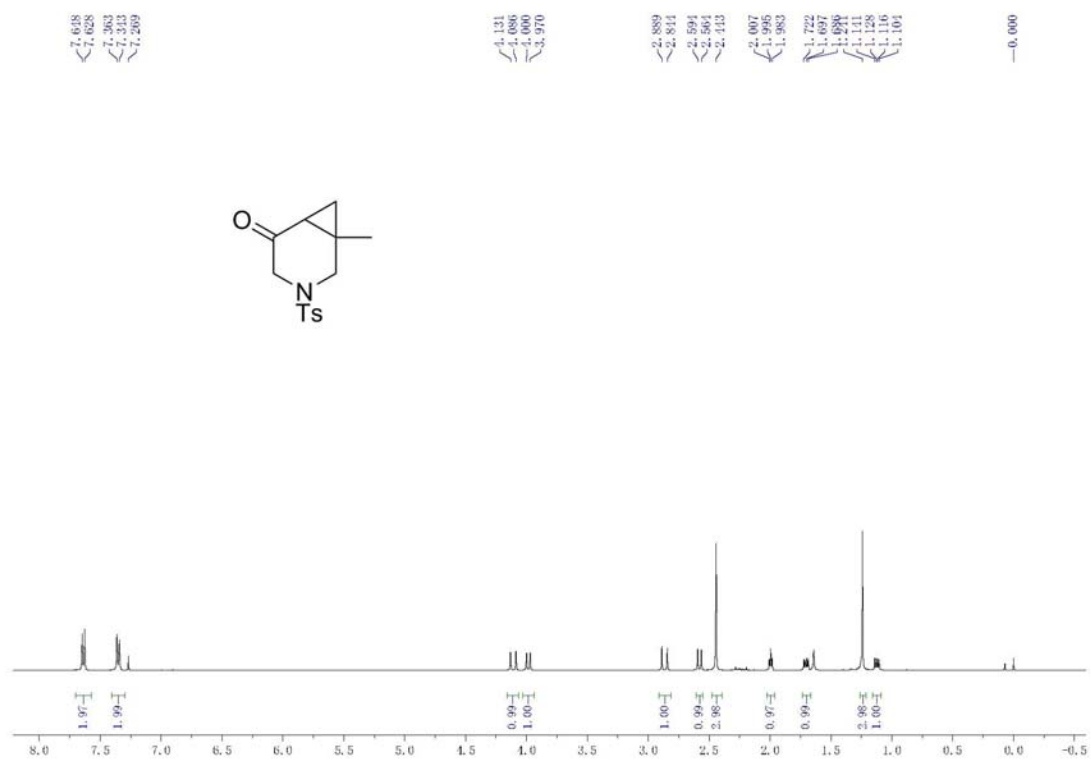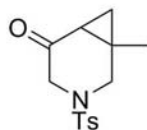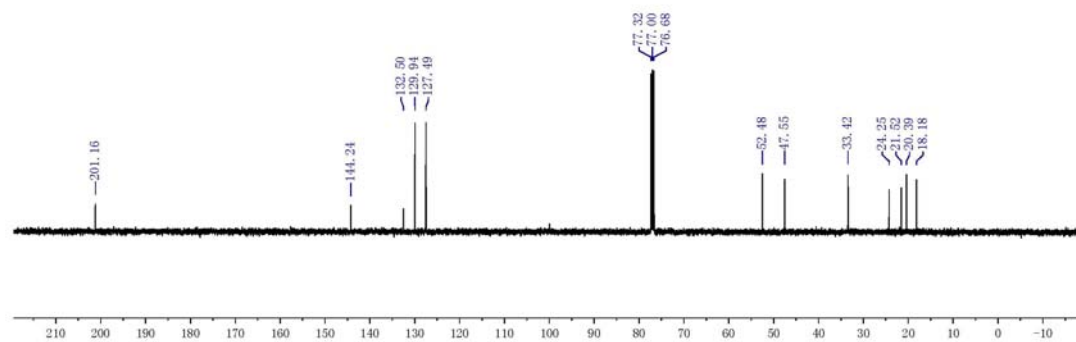



# 1,6-Dimethyl-3-tosyl-3-azabicyclo[4.1.0]heptan-5-one (2n)

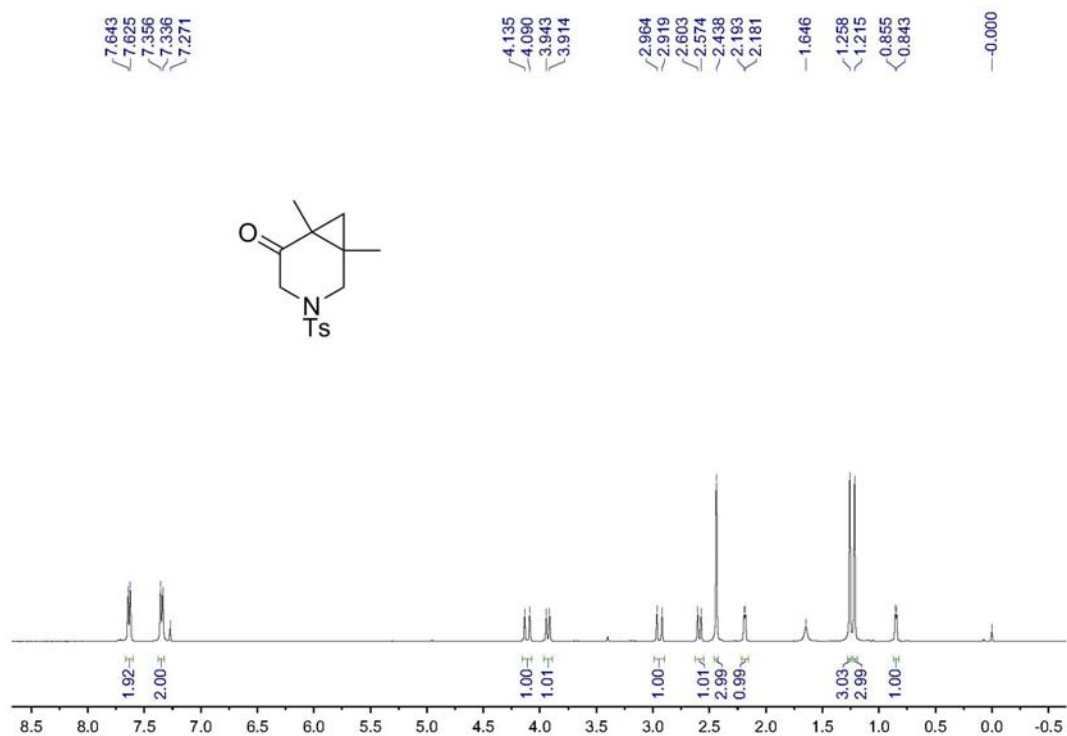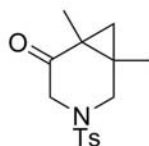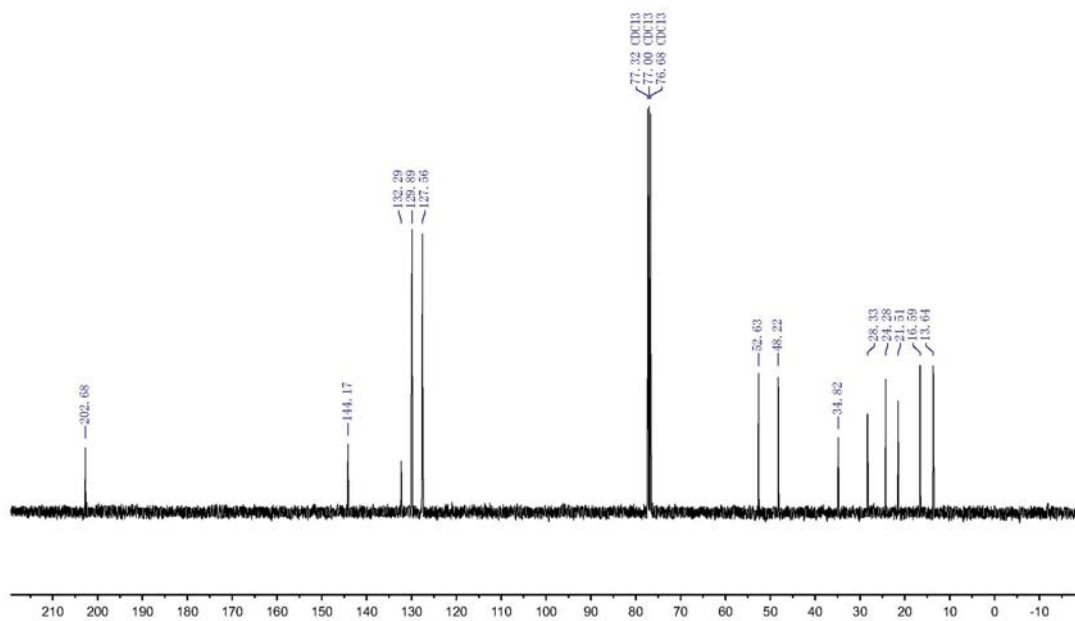

# 1-Methyl-6-pentyl-3-tosyl-3-azabicyclo[4.1.0]heptan-5-one (2o)

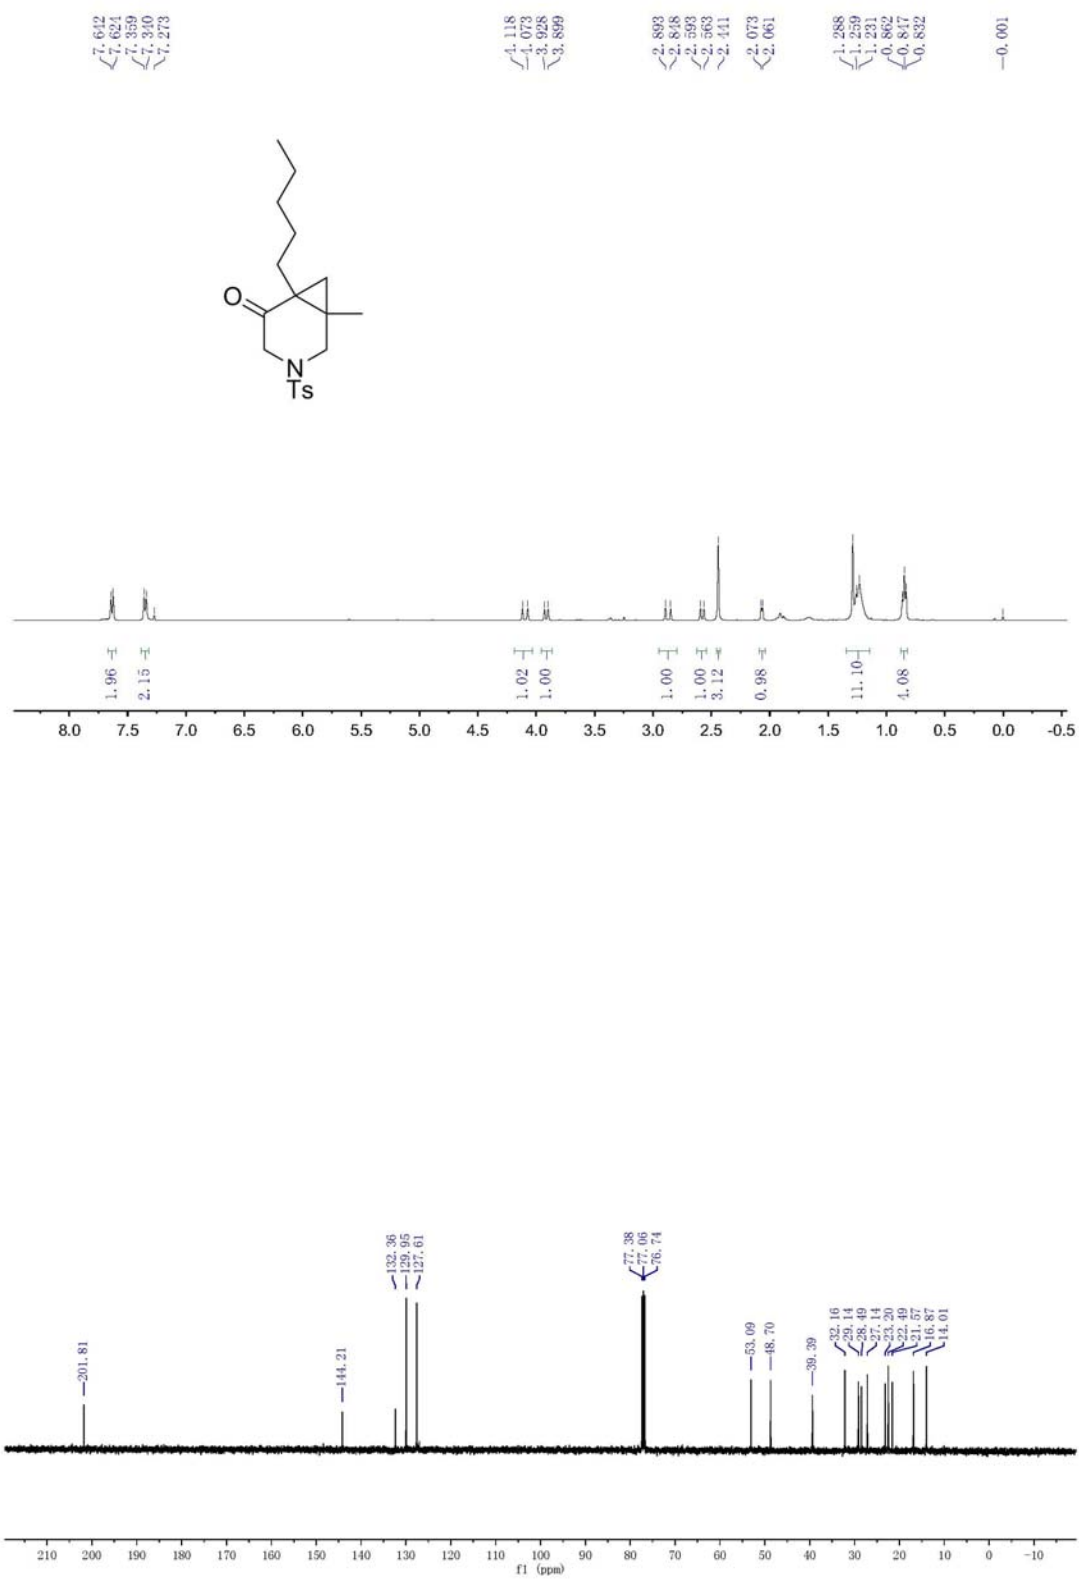

# 1-Phenyl-3-tosyl-3-azabicyclo[4.1.0]heptan-5-one (2q)

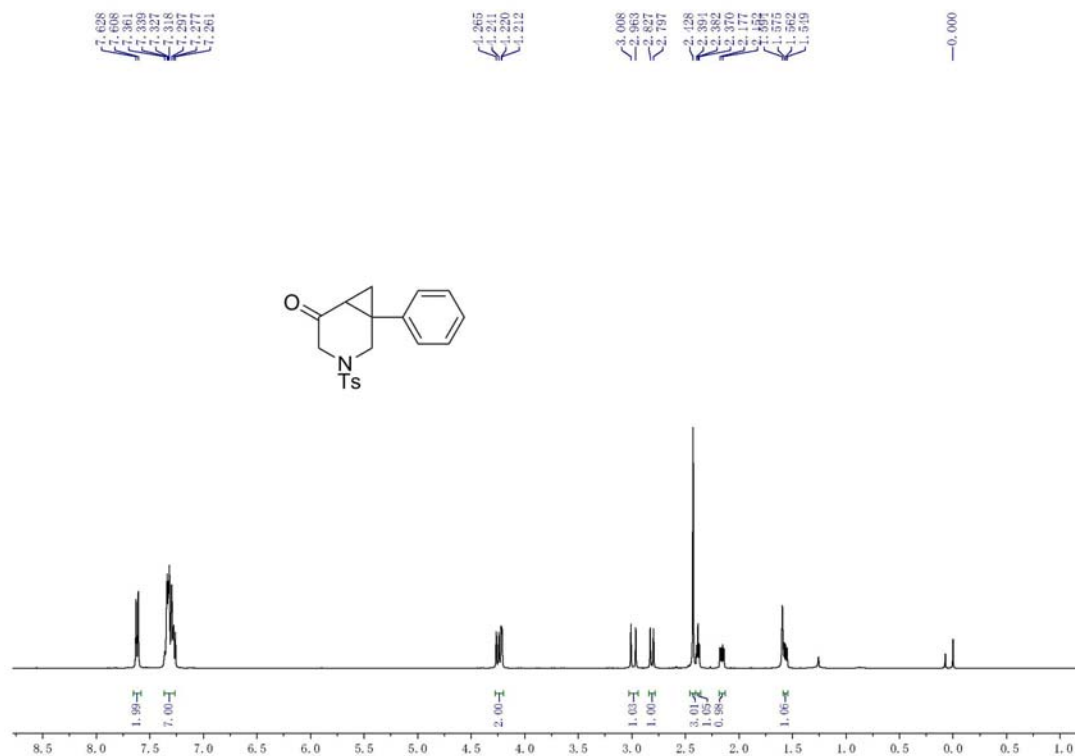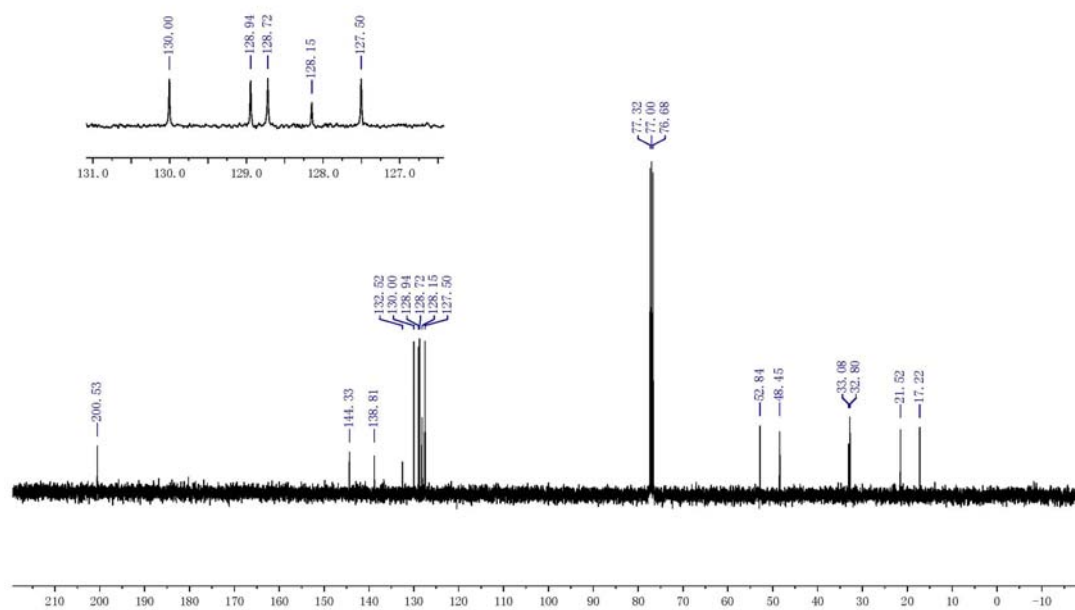

# 7-Methyl-6-phenyl-3-tosyl-3-azabicyclo[4.1.0]heptan-5-one (2s)

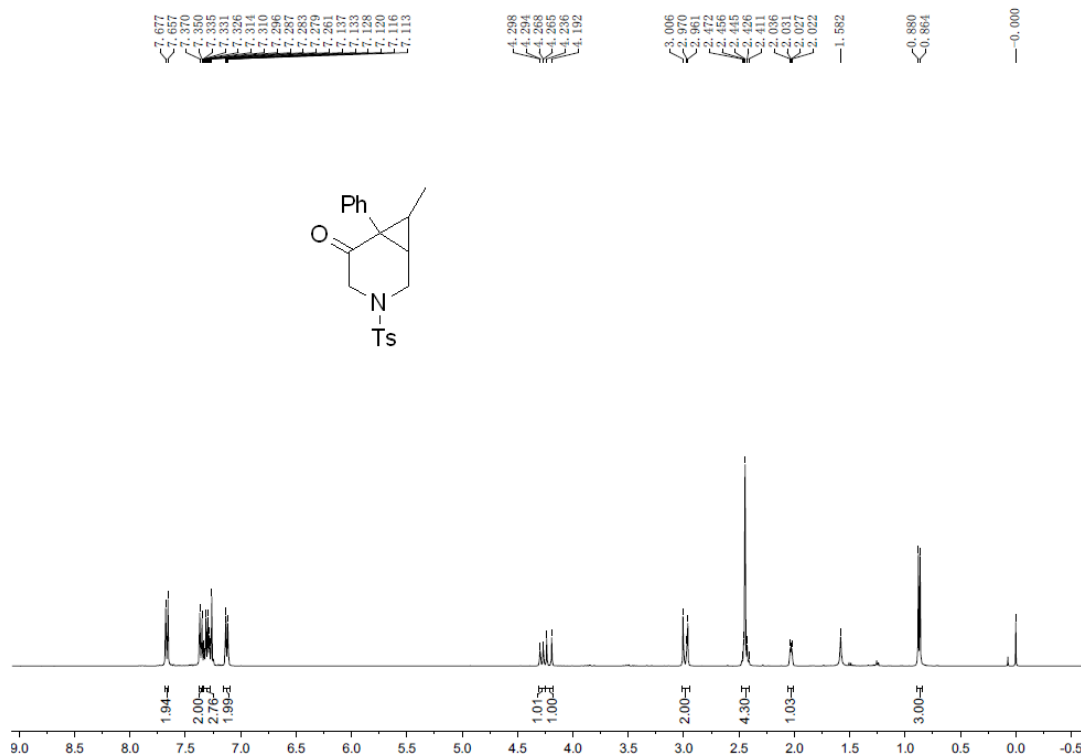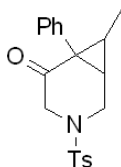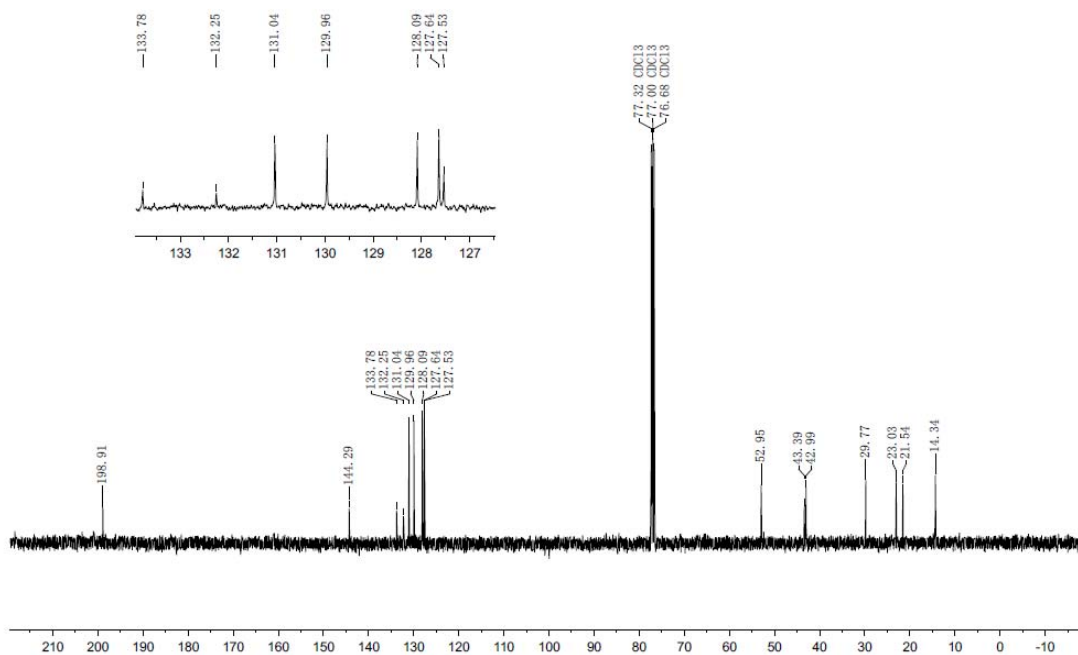

# 1-Methyl-6-phenyl-3-oxabicyclo[4.1.0]heptan-5-one (2t)

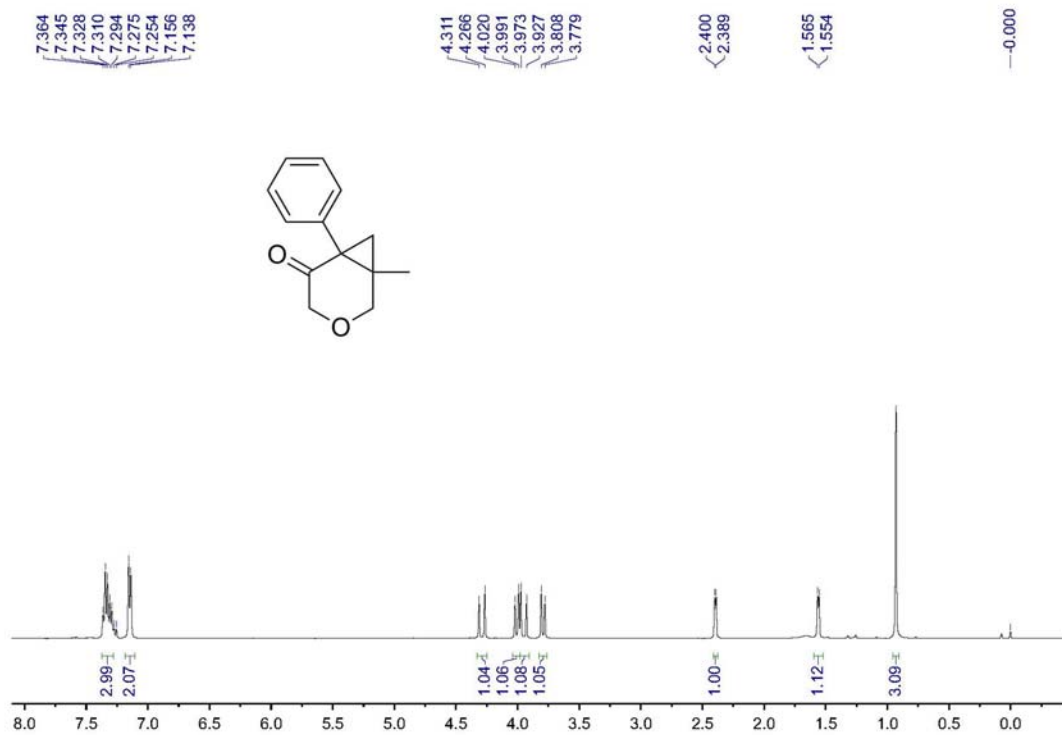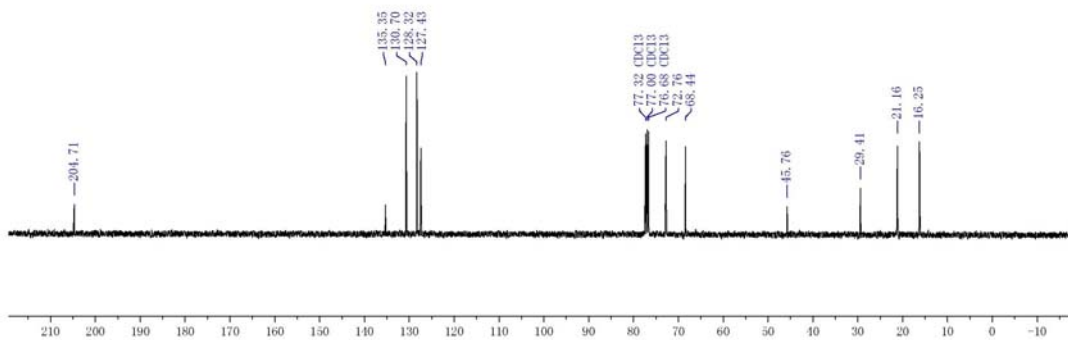

# 1,6-Diphenyl-3-oxabicyclo[4.1.0]heptan-5-one (2u)

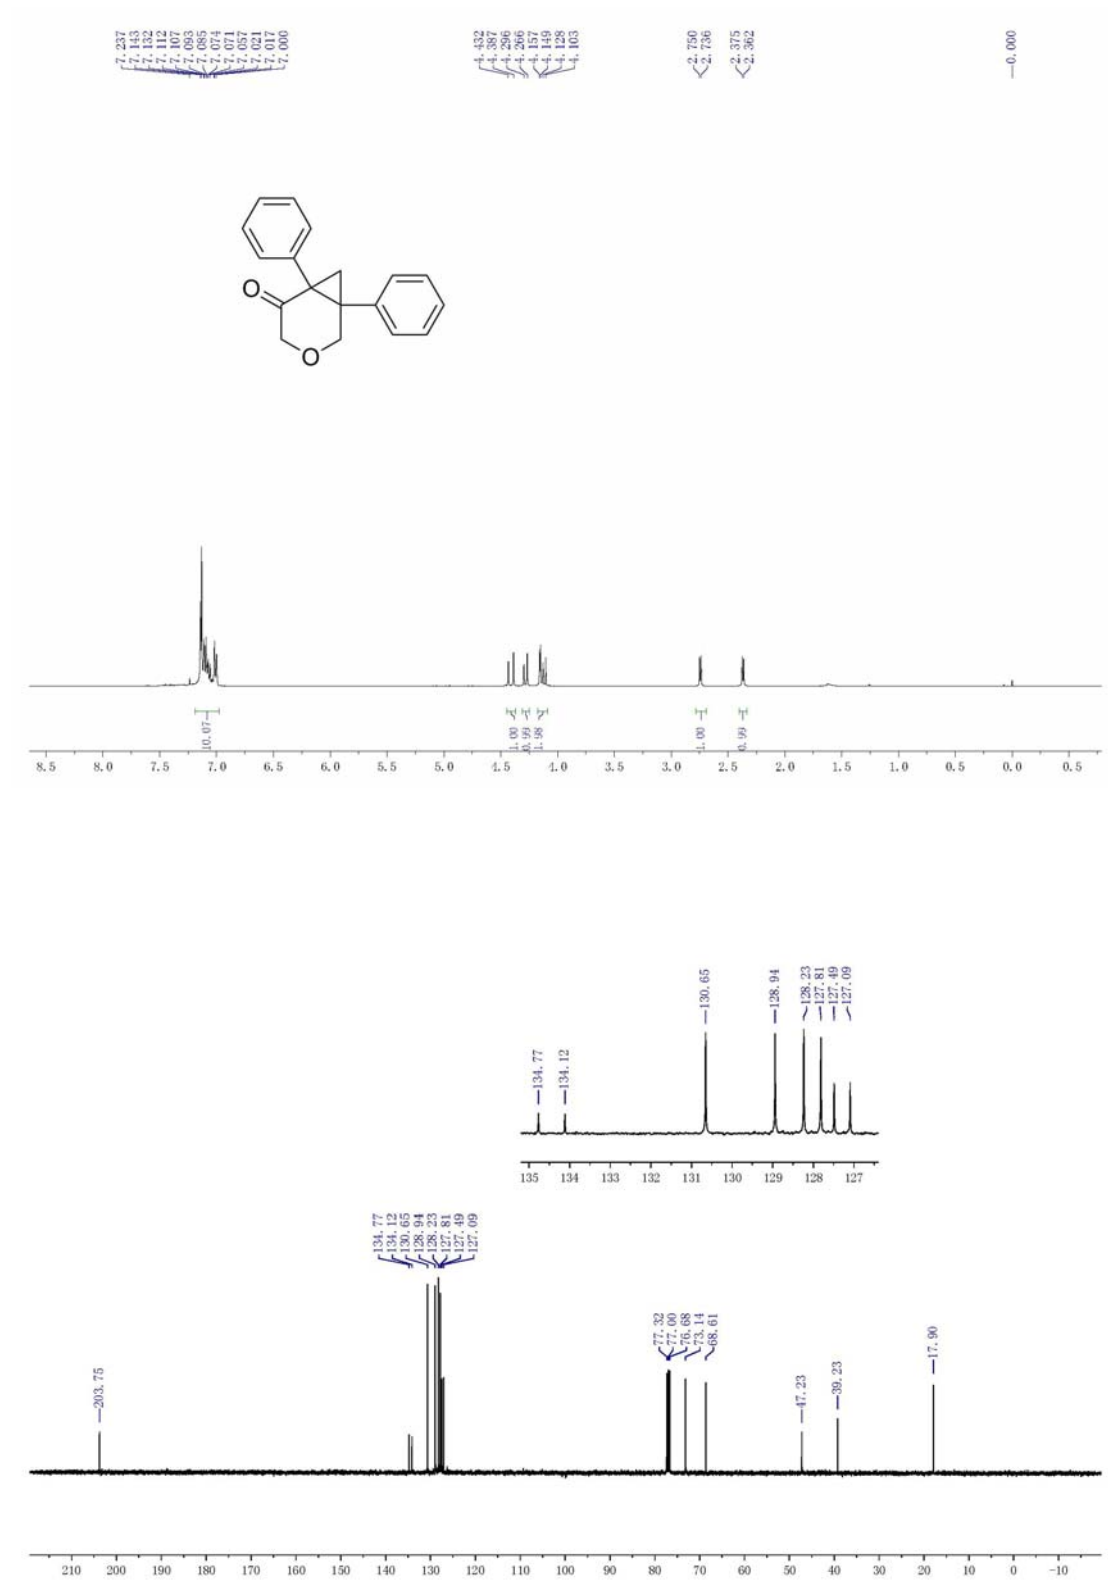

**Methyl 7-oxo-7a-phenyl-1,2,7,7a-tetrahydro-1aH-cyclopropa[b]naphthalene-1a-carboxylate (2v)**

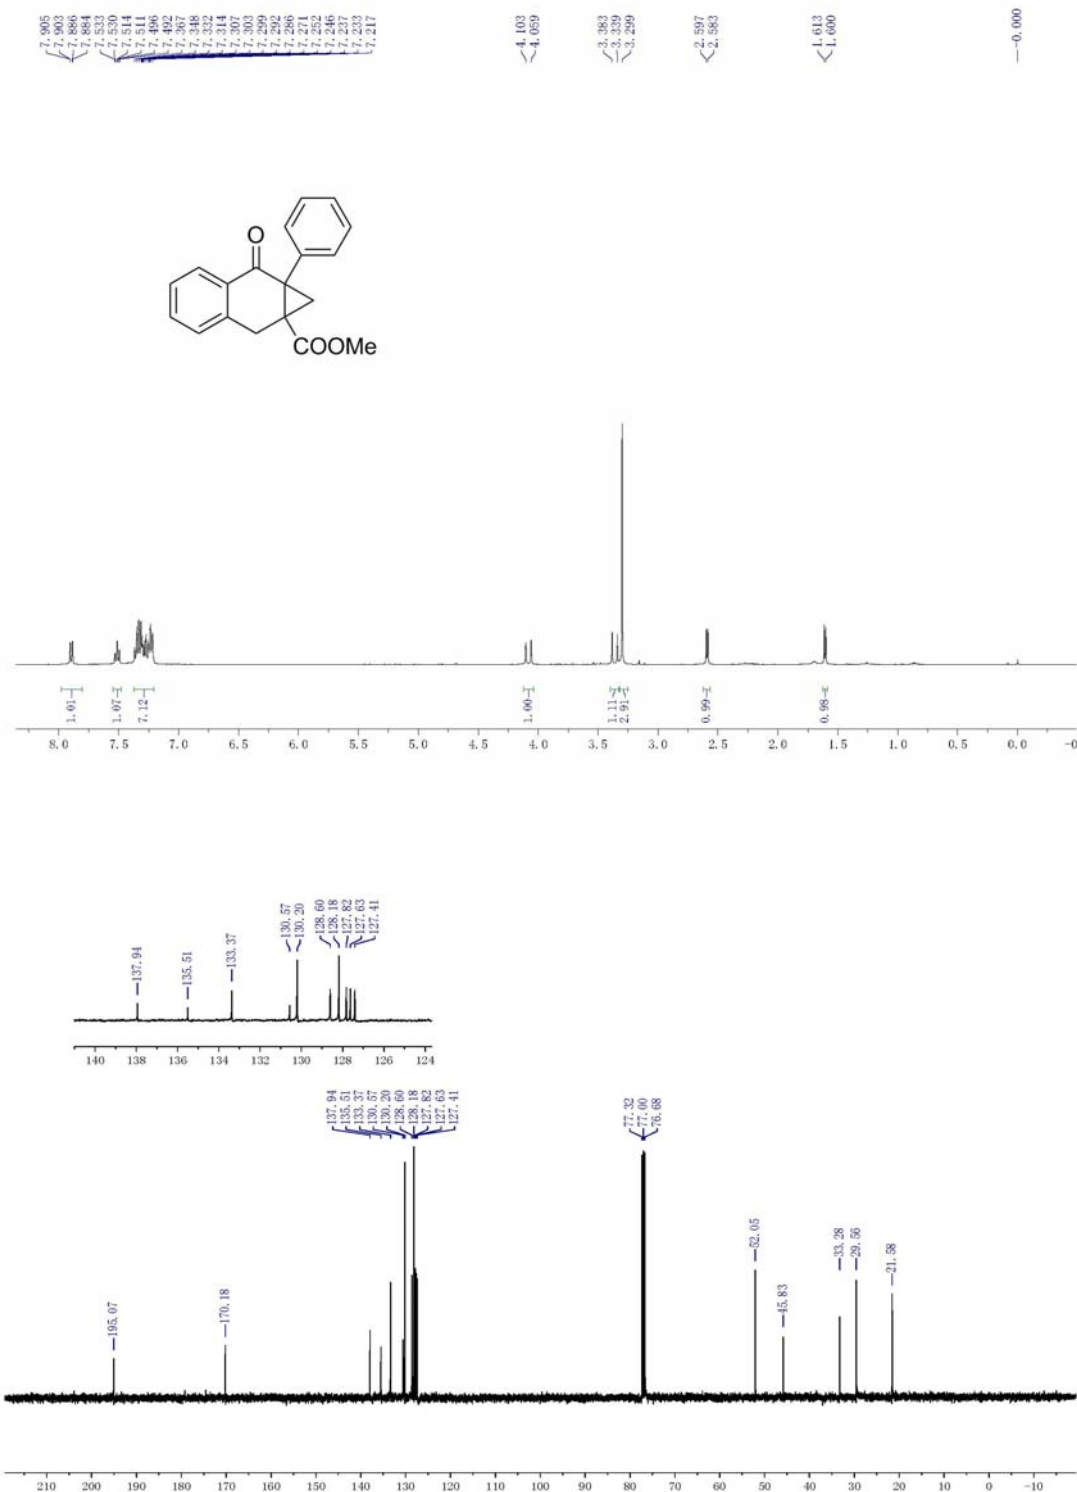

**Methyl 7-oxo-7a-(p-tolyl)-1,2,7,7a-tetrahydro-1aH-cyclopropa[b]naphthalene-1a-carboxylate (2w)**

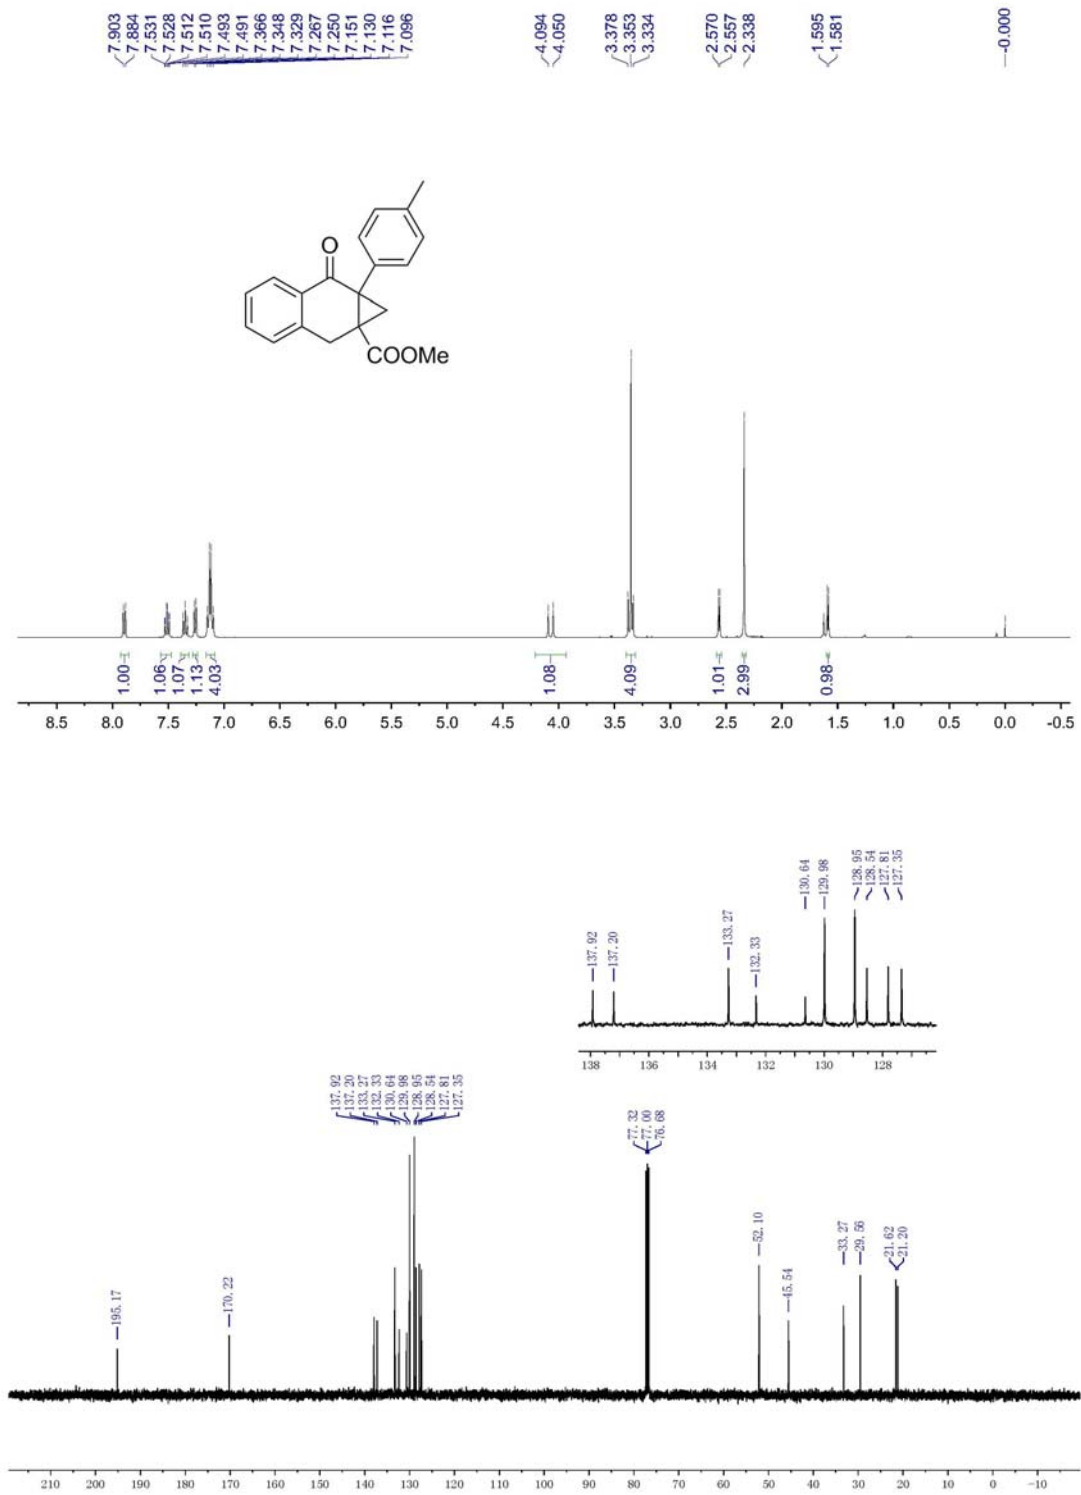



**Methyl 7a-(4-chlorophenyl)-7-oxo-1,2,7,7a-tetrahydro-1aH-cyclopropa[b]naphth  
alene-1a-carboxylate (2x)**

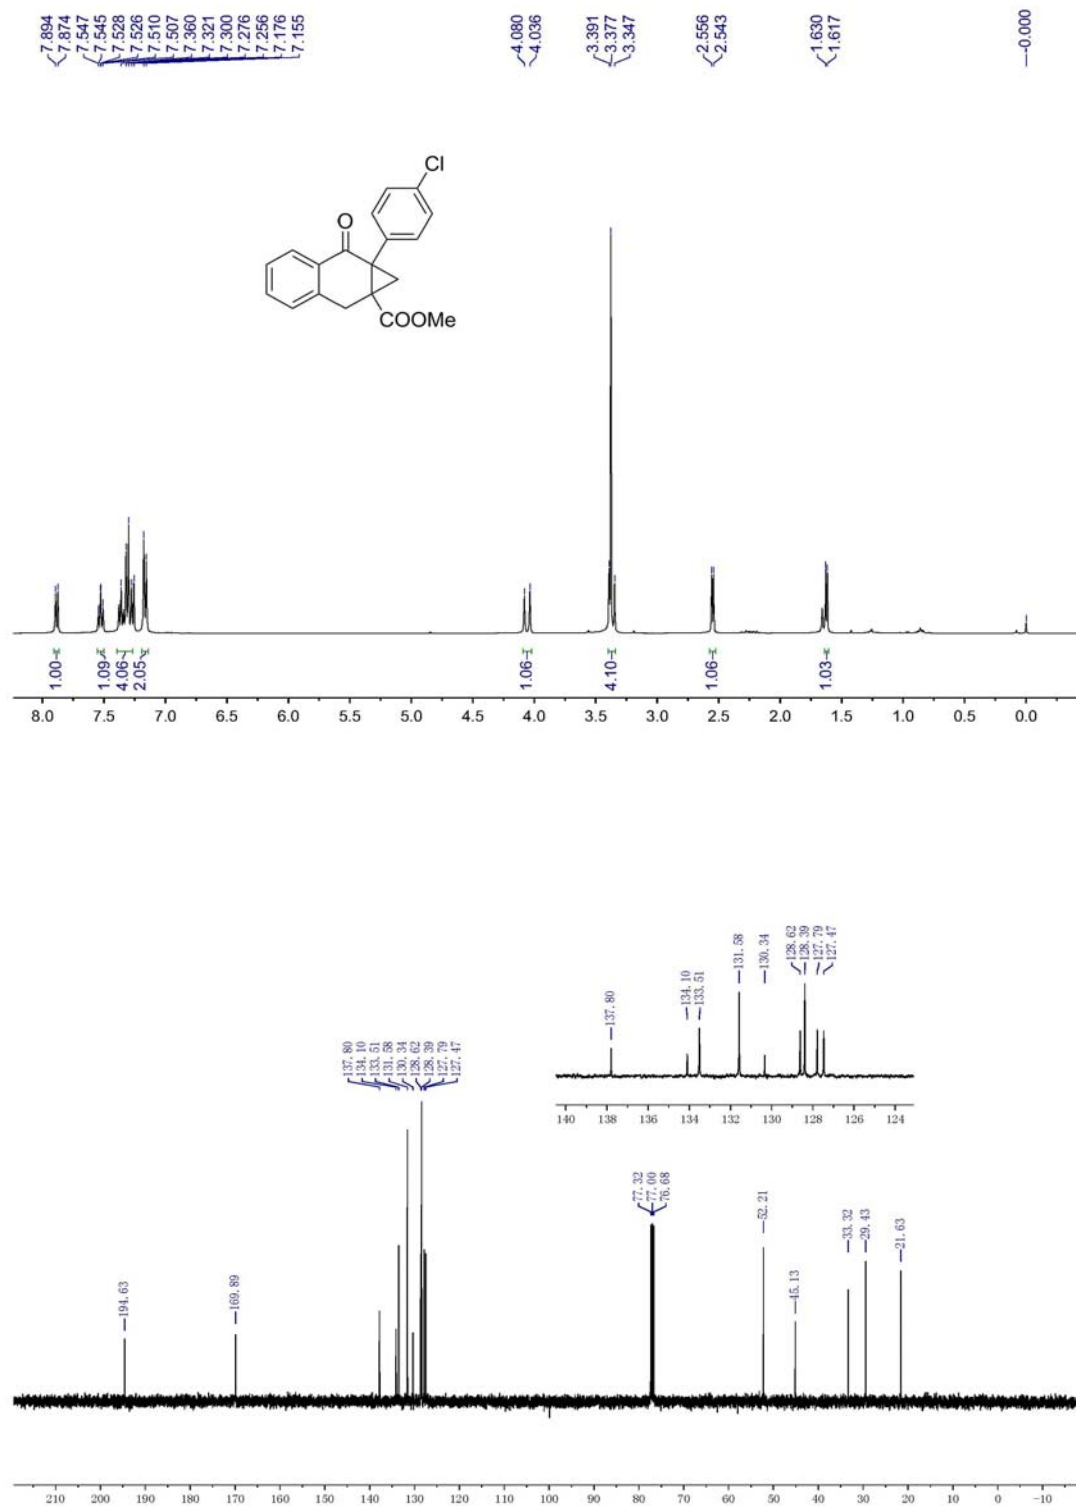

**Methyl 5-chloro-7-oxo-7a-phenyl-1,2,7a-tetrahydro-1aH-cyclopropa[b]naphthalene-1a-carboxylate (2y)**

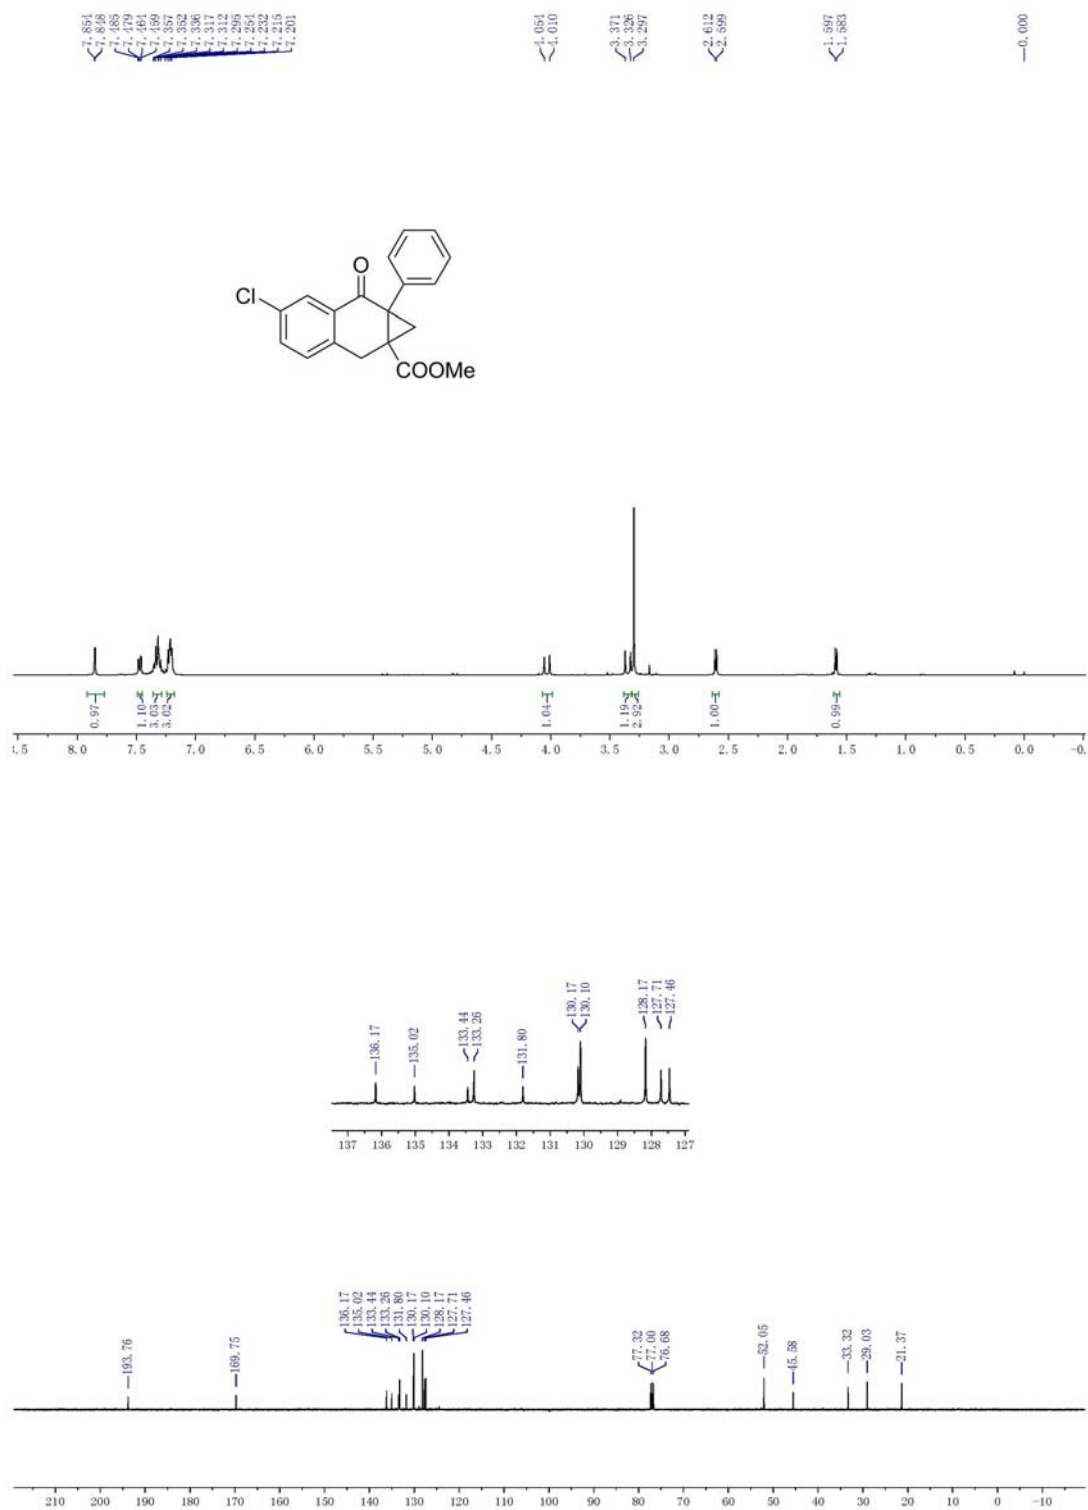

**Methyl 7-oxo-7a-(thiophen-2-yl)-1,2,7,7a-tetrahydro-1aH-cyclopropa[b]naphthalene-1a-carboxylate (2z)**

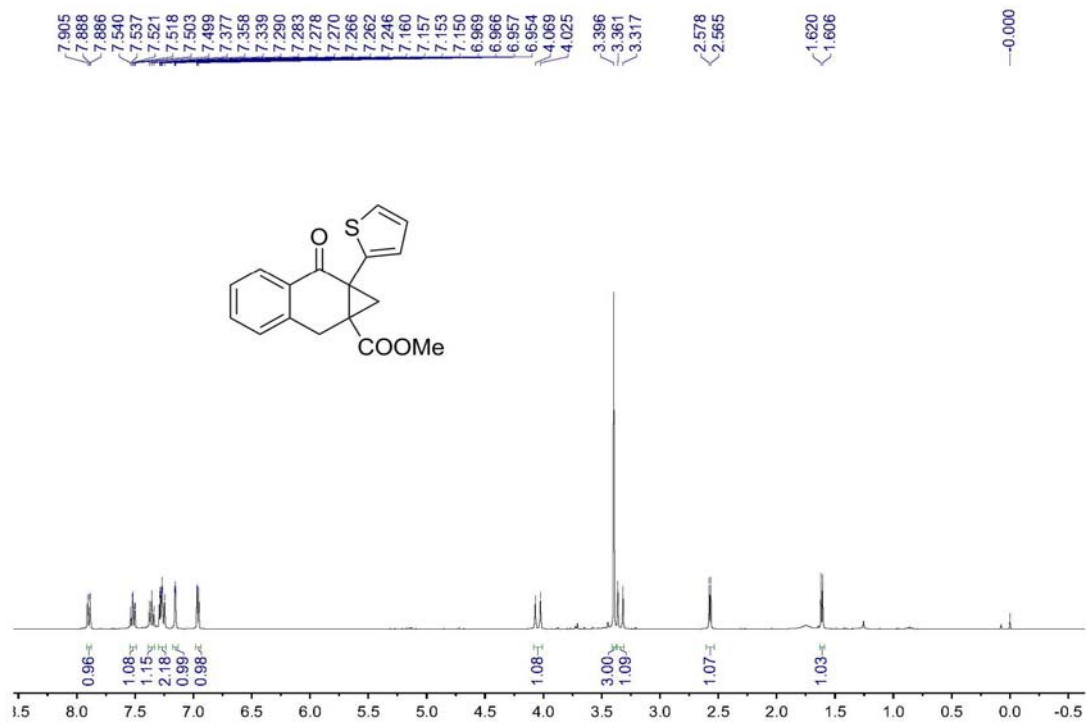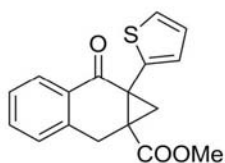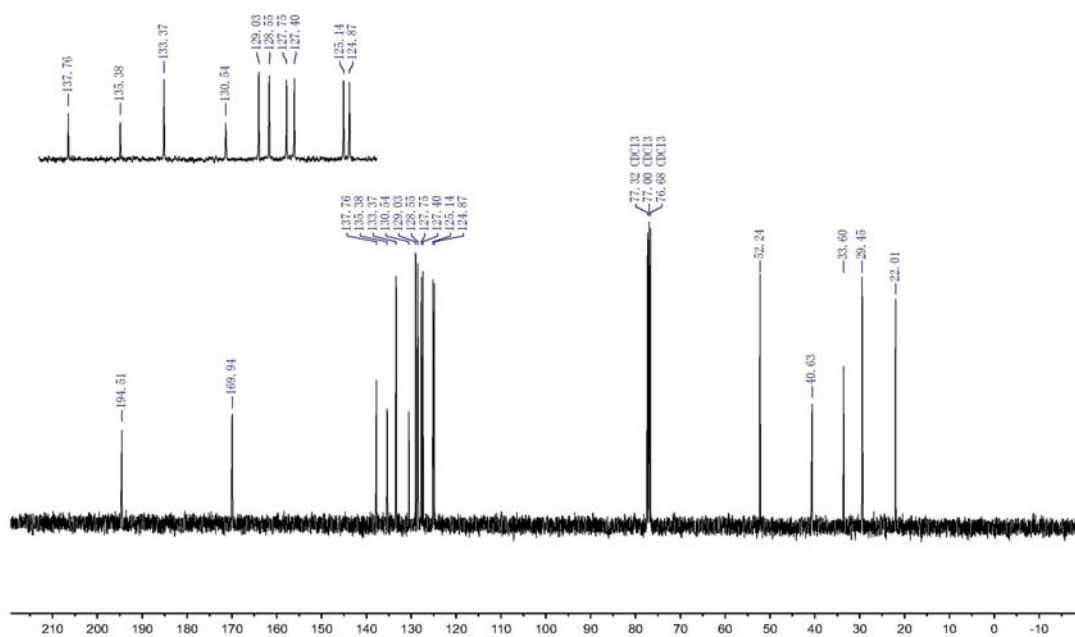

**Methyl 5-chloro-7a-cyclopropyl-7-oxo-1,2,7,7a-tetrahydro-1aH-cyclopropa[b]na  
phthalene-1a-carboxylate (2aa)**

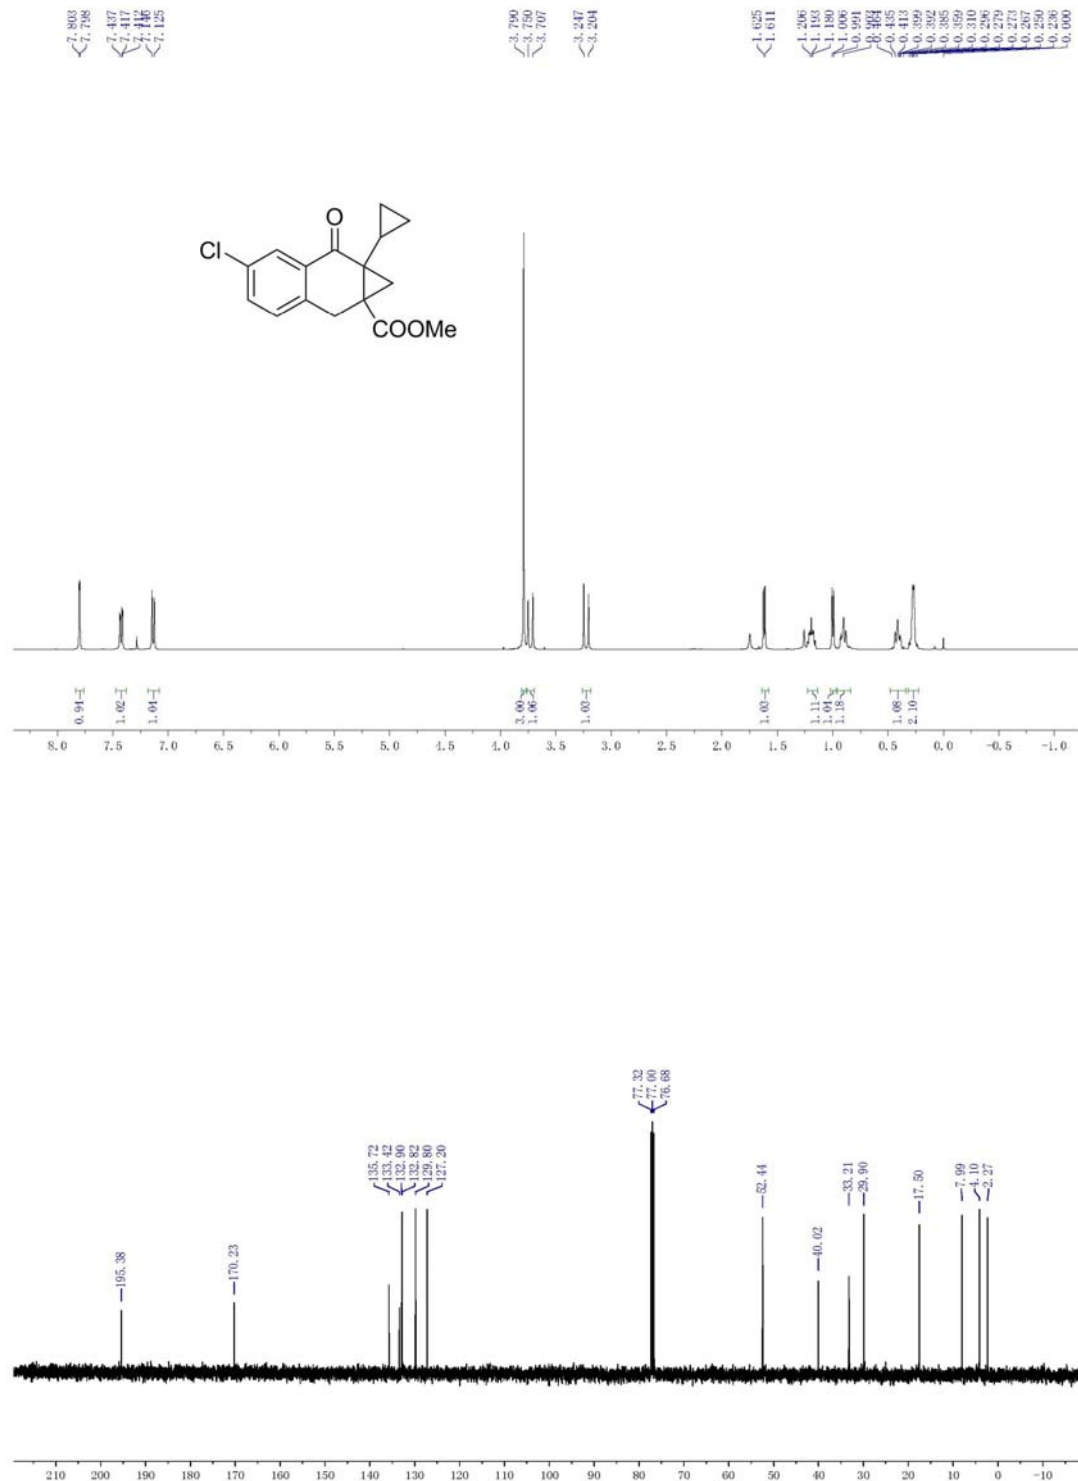

**1a-Phenyl-1,1a,7,7a-tetrahydro-2H-cyclopropa[b]naphthalen-2-one (2ab)**

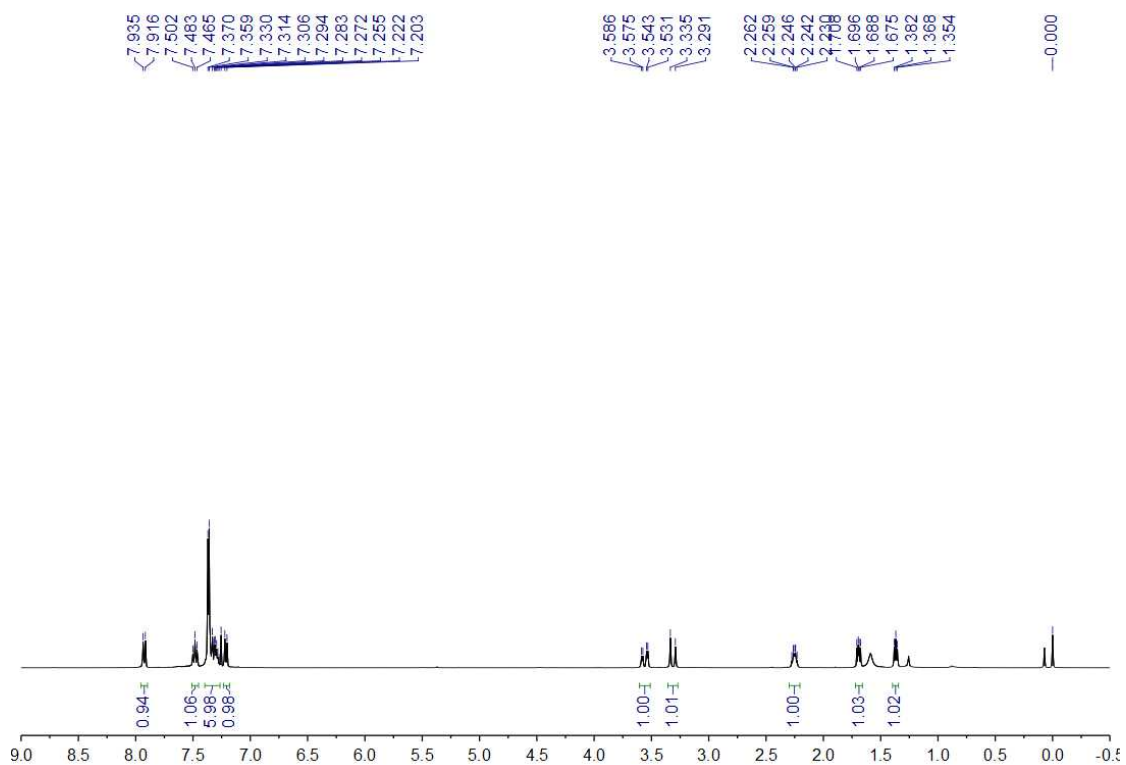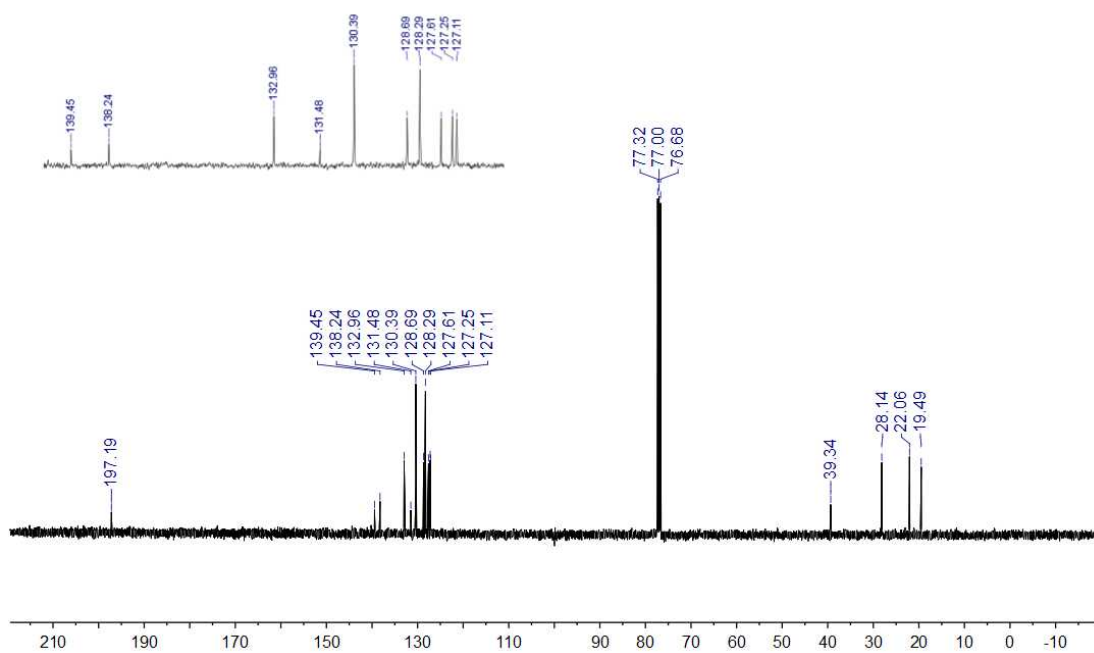

---

## (D) The X-ray Single-crystal Diffraction Analysis of Product 2a

CCDC 1029834

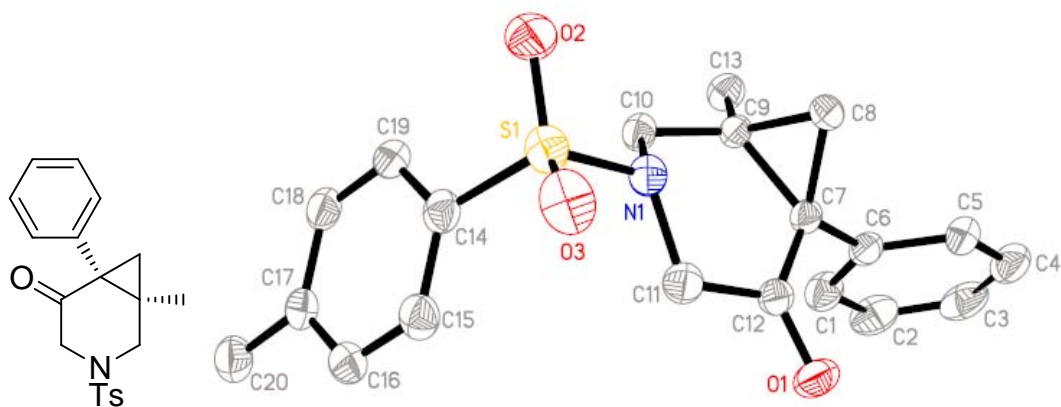

Table 1. Crystal data and structure refinement for mo\_20140503D\_0m.

|                             |                                                                                                                           |
|-----------------------------|---------------------------------------------------------------------------------------------------------------------------|
| Identification code         | mo_20140503d_0m                                                                                                           |
| Empirical formula           | C <sub>20</sub> H <sub>21</sub> N O <sub>3</sub> S                                                                        |
| Formula weight              | 355.44                                                                                                                    |
| Temperature                 | 298(2) K                                                                                                                  |
| Wavelength                  | 0.71073 Å                                                                                                                 |
| Crystal system, space group | Monoclinic, P 21/c                                                                                                        |
| Unit cell dimensions        | a = 10.7830(9) Å    alpha = 90 deg.<br>b = 12.0241(10) Å    beta = 93.965(2) deg.<br>c = 14.0523(12) Å    gamma = 90 deg. |
| Volume                      | 1817.6(3) Å <sup>3</sup>                                                                                                  |
| Z, Calculated density       | 4, 1.299 Mg/m <sup>3</sup>                                                                                                |
| Absorption coefficient      | 0.196 mm <sup>-1</sup>                                                                                                    |
| F(000)                      | 752                                                                                                                       |
| Crystal size                | 0.24 x 0.20 x 0.15 mm                                                                                                     |

---

|                                   |                                             |
|-----------------------------------|---------------------------------------------|
| Theta range for data collection   | 2.23 to 26.00 deg.                          |
| Limiting indices                  | -13<=h<=13, -12<=k<=14, -15<=l<=17          |
| Reflections collected / unique    | 14373 / 3550 [R(int) = 0.0209]              |
| Completeness to theta = 26.00     | 99.4 %                                      |
| Absorption correction             | Semi-empirical from equivalents             |
| Max. and min. transmission        | 0.9711 and 0.9544                           |
| Refinement method                 | Full-matrix least-squares on F <sup>2</sup> |
| Data / restraints / parameters    | 3550 / 0 / 228                              |
| Goodness-of-fit on F <sup>2</sup> | 1.085                                       |
| Final R indices [I>2sigma(I)]     | R1 = 0.0387, wR2 = 0.1157                   |
| R indices (all data)              | R1 = 0.0483, wR2 = 0.1225                   |
| Largest diff. peak and hole       | 0.206 and -0.264 e.A <sup>-3</sup>          |

Table 2. Atomic coordinates ( x 10<sup>4</sup>) and equivalent isotropic displacement parameters (A<sup>2</sup> x 10<sup>3</sup>) for mo\_20140503D\_0m. U(eq) is defined as one third of the trace of the orthogonalized Uij tensor.

---

|      | x       | y       | z        | U(eq) |
|------|---------|---------|----------|-------|
| S(1) | 1447(1) | 1171(1) | 1405(1)  | 55(1) |
| N(1) | 2617(1) | 1433(1) | 738(1)   | 45(1) |
| O(1) | 3331(1) | 1249(1) | -1713(1) | 62(1) |
| O(2) | 1943(1) | 1206(1) | 2367(1)  | 72(1) |
| O(3) | 865(1)  | 178(1)  | 1033(1)  | 75(1) |
| C(1) | 5341(2) | 3400(2) | -1499(1) | 58(1) |
| C(2) | 6172(2) | 3835(2) | -2103(1) | 72(1) |

---

---

|       |          |         |          |       |
|-------|----------|---------|----------|-------|
| C(3)  | 7185(2)  | 3222(2) | -2330(1) | 75(1) |
| C(4)  | 7364(2)  | 2174(2) | -1966(1) | 67(1) |
| C(5)  | 6547(2)  | 1747(2) | -1352(1) | 53(1) |
| C(6)  | 5534(2)  | 2353(1) | -1100(1) | 43(1) |
| C(7)  | 4641(1)  | 1901(1) | -418(1)  | 39(1) |
| C(8)  | 5191(2)  | 1314(1) | 487(1)   | 44(1) |
| C(9)  | 4590(1)  | 2412(1) | 585(1)   | 38(1) |
| C(10) | 3348(1)  | 2429(1) | 1011(1)  | 43(1) |
| C(11) | 2331(2)  | 1338(2) | -295(1)  | 51(1) |
| C(12) | 3462(2)  | 1463(1) | -875(1)  | 42(1) |
| C(13) | 5359(2)  | 3427(1) | 848(1)   | 51(1) |
| C(14) | 421(2)   | 2294(1) | 1208(1)  | 49(1) |
| C(15) | -469(2)  | 2262(2) | 447(1)   | 54(1) |
| C(16) | -1179(2) | 3195(2) | 240(1)   | 56(1) |
| C(17) | -1025(2) | 4166(2) | 772(1)   | 50(1) |
| C(18) | -143(2)  | 4169(2) | 1538(1)  | 55(1) |
| C(19) | 584(2)   | 3255(2) | 1760(1)  | 54(1) |
| C(20) | -1786(2) | 5177(2) | 511(2)   | 66(1) |

---

Table 3. Bond lengths [Å] and angles [deg] for mo\_20140503D\_0m.

---

|            |            |
|------------|------------|
| S(1)-O(2)  | 1.4203(15) |
| S(1)-O(3)  | 1.4306(15) |
| S(1)-N(1)  | 1.6534(13) |
| S(1)-C(14) | 1.7554(17) |
| N(1)-C(11) | 1.467(2)   |
| N(1)-C(10) | 1.471(2)   |

---



---

|              |            |
|--------------|------------|
| O(1)-C(12)   | 1.2051(19) |
| C(1)-C(2)    | 1.380(3)   |
| C(1)-C(6)    | 1.388(2)   |
| C(1)-H(1)    | 0.9300     |
| C(2)-C(3)    | 1.373(3)   |
| C(2)-H(2)    | 0.9300     |
| C(3)-C(4)    | 1.369(3)   |
| C(3)-H(3)    | 0.9300     |
| C(4)-C(5)    | 1.375(3)   |
| C(4)-H(4)    | 0.9300     |
| C(5)-C(6)    | 1.380(2)   |
| C(5)-H(5)    | 0.9300     |
| C(6)-C(7)    | 1.506(2)   |
| C(7)-C(12)   | 1.480(2)   |
| C(7)-C(8)    | 1.537(2)   |
| C(7)-C(9)    | 1.542(2)   |
| C(8)-C(9)    | 1.481(2)   |
| C(8)-H(8A)   | 0.9700     |
| C(8)-H(8B)   | 0.9700     |
| C(9)-C(10)   | 1.505(2)   |
| C(9)-C(13)   | 1.507(2)   |
| C(10)-H(10A) | 0.9700     |
| C(10)-H(10B) | 0.9700     |
| C(11)-C(12)  | 1.520(2)   |
| C(11)-H(11A) | 0.9700     |
| C(11)-H(11B) | 0.9700     |
| C(13)-H(13A) | 0.9600     |

---

|                  |            |
|------------------|------------|
| C(13)-H(13B)     | 0.9600     |
| C(13)-H(13C)     | 0.9600     |
| C(14)-C(15)      | 1.386(2)   |
| C(14)-C(19)      | 1.396(2)   |
| C(15)-C(16)      | 1.379(3)   |
| C(15)-H(15)      | 0.9300     |
| C(16)-C(17)      | 1.389(3)   |
| C(16)-H(16)      | 0.9300     |
| C(17)-C(18)      | 1.386(2)   |
| C(17)-C(20)      | 1.498(3)   |
| C(18)-C(19)      | 1.374(3)   |
| C(18)-H(18)      | 0.9300     |
| C(19)-H(19)      | 0.9300     |
| C(20)-H(20A)     | 0.9600     |
| C(20)-H(20B)     | 0.9600     |
| C(20)-H(20C)     | 0.9600     |
| O(2)-S(1)-O(3)   | 119.96(9)  |
| O(2)-S(1)-N(1)   | 106.40(8)  |
| O(3)-S(1)-N(1)   | 106.50(8)  |
| O(2)-S(1)-C(14)  | 108.63(9)  |
| O(3)-S(1)-C(14)  | 109.16(9)  |
| N(1)-S(1)-C(14)  | 105.17(7)  |
| C(11)-N(1)-C(10) | 113.16(13) |
| C(11)-N(1)-S(1)  | 115.46(11) |
| C(10)-N(1)-S(1)  | 115.05(10) |
| C(2)-C(1)-C(6)   | 120.46(19) |
| C(2)-C(1)-H(1)   | 119.8      |

---

|                 |            |
|-----------------|------------|
| C(6)-C(1)-H(1)  | 119.8      |
| C(3)-C(2)-C(1)  | 120.0(2)   |
| C(3)-C(2)-H(2)  | 120.0      |
| C(1)-C(2)-H(2)  | 120.0      |
| C(4)-C(3)-C(2)  | 120.10(18) |
| C(4)-C(3)-H(3)  | 119.9      |
| C(2)-C(3)-H(3)  | 119.9      |
| C(3)-C(4)-C(5)  | 119.88(19) |
| C(3)-C(4)-H(4)  | 120.1      |
| C(5)-C(4)-H(4)  | 120.1      |
| C(4)-C(5)-C(6)  | 121.16(19) |
| C(4)-C(5)-H(5)  | 119.4      |
| C(6)-C(5)-H(5)  | 119.4      |
| C(5)-C(6)-C(1)  | 118.34(16) |
| C(5)-C(6)-C(7)  | 121.68(15) |
| C(1)-C(6)-C(7)  | 119.98(14) |
| C(12)-C(7)-C(6) | 114.87(13) |
| C(12)-C(7)-C(8) | 117.78(13) |
| C(6)-C(7)-C(8)  | 117.71(12) |
| C(12)-C(7)-C(9) | 117.00(12) |
| C(6)-C(7)-C(9)  | 120.11(13) |
| C(8)-C(7)-C(9)  | 57.52(9)   |
| C(9)-C(8)-C(7)  | 61.40(10)  |
| C(9)-C(8)-H(8A) | 117.6      |
| C(7)-C(8)-H(8A) | 117.6      |
| C(9)-C(8)-H(8B) | 117.6      |
| C(7)-C(8)-H(8B) | 117.6      |

---

|                     |            |
|---------------------|------------|
| H(8A)-C(8)-H(8B)    | 114.7      |
| C(8)-C(9)-C(10)     | 117.10(13) |
| C(8)-C(9)-C(13)     | 120.51(13) |
| C(10)-C(9)-C(13)    | 112.40(12) |
| C(8)-C(9)-C(7)      | 61.08(9)   |
| C(10)-C(9)-C(7)     | 117.26(12) |
| C(13)-C(9)-C(7)     | 119.61(13) |
| N(1)-C(10)-C(9)     | 111.17(12) |
| N(1)-C(10)-H(10A)   | 109.4      |
| C(9)-C(10)-H(10A)   | 109.4      |
| N(1)-C(10)-H(10B)   | 109.4      |
| C(9)-C(10)-H(10B)   | 109.4      |
| H(10A)-C(10)-H(10B) | 108.0      |
| N(1)-C(11)-C(12)    | 113.64(13) |
| N(1)-C(11)-H(11A)   | 108.8      |
| C(12)-C(11)-H(11A)  | 108.8      |
| N(1)-C(11)-H(11B)   | 108.8      |
| C(12)-C(11)-H(11B)  | 108.8      |
| H(11A)-C(11)-H(11B) | 107.7      |
| O(1)-C(12)-C(7)     | 122.62(15) |
| O(1)-C(12)-C(11)    | 117.29(15) |
| C(7)-C(12)-C(11)    | 119.98(13) |
| C(9)-C(13)-H(13A)   | 109.5      |
| C(9)-C(13)-H(13B)   | 109.5      |
| H(13A)-C(13)-H(13B) | 109.5      |
| C(9)-C(13)-H(13C)   | 109.5      |
| H(13A)-C(13)-H(13C) | 109.5      |

---

|                     |            |
|---------------------|------------|
| H(13B)-C(13)-H(13C) | 109.5      |
| C(15)-C(14)-C(19)   | 120.37(16) |
| C(15)-C(14)-S(1)    | 119.68(14) |
| C(19)-C(14)-S(1)    | 119.65(13) |
| C(16)-C(15)-C(14)   | 119.01(16) |
| C(16)-C(15)-H(15)   | 120.5      |
| C(14)-C(15)-H(15)   | 120.5      |
| C(15)-C(16)-C(17)   | 121.73(17) |
| C(15)-C(16)-H(16)   | 119.1      |
| C(17)-C(16)-H(16)   | 119.1      |
| C(18)-C(17)-C(16)   | 118.05(17) |
| C(18)-C(17)-C(20)   | 121.47(17) |
| C(16)-C(17)-C(20)   | 120.48(17) |
| C(19)-C(18)-C(17)   | 121.61(17) |
| C(19)-C(18)-H(18)   | 119.2      |
| C(17)-C(18)-H(18)   | 119.2      |
| C(18)-C(19)-C(14)   | 119.20(16) |
| C(18)-C(19)-H(19)   | 120.4      |
| C(14)-C(19)-H(19)   | 120.4      |
| C(17)-C(20)-H(20A)  | 109.5      |
| C(17)-C(20)-H(20B)  | 109.5      |
| H(20A)-C(20)-H(20B) | 109.5      |
| C(17)-C(20)-H(20C)  | 109.5      |
| H(20A)-C(20)-H(20C) | 109.5      |
| H(20B)-C(20)-H(20C) | 109.5      |

---

Symmetry transformations used to generate equivalent atoms:

Table 4. Anisotropic displacement parameters ( $\text{\AA}^2 \times 10^3$ ) for mo\_20140503D\_0m.

The anisotropic displacement factor exponent takes the form:

$$-2 \pi^2 [ h^2 a^{*2} U_{11} + \dots + 2 h k a^* b^* U_{12} ]$$

|       | U11    | U22    | U33    | U23    | U13   | U12    |
|-------|--------|--------|--------|--------|-------|--------|
| S(1)  | 53(1)  | 53(1)  | 61(1)  | 16(1)  | 14(1) | 0(1)   |
| N(1)  | 46(1)  | 43(1)  | 48(1)  | 3(1)   | 8(1)  | 2(1)   |
| O(1)  | 67(1)  | 76(1)  | 43(1)  | -14(1) | 0(1)  | -5(1)  |
| O(2)  | 70(1)  | 89(1)  | 59(1)  | 30(1)  | 12(1) | 4(1)   |
| O(3)  | 71(1)  | 48(1)  | 106(1) | 13(1)  | 17(1) | -12(1) |
| C(1)  | 74(1)  | 53(1)  | 47(1)  | 6(1)   | 12(1) | 5(1)   |
| C(2)  | 100(2) | 68(1)  | 48(1)  | 11(1)  | 11(1) | -14(1) |
| C(3)  | 75(1)  | 111(2) | 41(1)  | -3(1)  | 17(1) | -28(1) |
| C(4)  | 57(1)  | 97(2)  | 49(1)  | -12(1) | 14(1) | -3(1)  |
| C(5)  | 52(1)  | 60(1)  | 47(1)  | -7(1)  | 8(1)  | 5(1)   |
| C(6)  | 49(1)  | 46(1)  | 35(1)  | -4(1)  | 5(1)  | 1(1)   |
| C(7)  | 46(1)  | 36(1)  | 36(1)  | -1(1)  | 4(1)  | 7(1)   |
| C(8)  | 48(1)  | 42(1)  | 41(1)  | 3(1)   | 2(1)  | 10(1)  |
| C(9)  | 44(1)  | 37(1)  | 33(1)  | 0(1)   | 4(1)  | 5(1)   |
| C(10) | 47(1)  | 39(1)  | 42(1)  | -1(1)  | 8(1)  | 5(1)   |
| C(11) | 47(1)  | 55(1)  | 51(1)  | -6(1)  | 2(1)  | -1(1)  |
| C(12) | 51(1)  | 34(1)  | 41(1)  | -2(1)  | 1(1)  | 7(1)   |
| C(13) | 54(1)  | 49(1)  | 49(1)  | -6(1)  | 4(1)  | -3(1)  |
| C(14) | 43(1)  | 55(1)  | 50(1)  | 3(1)   | 14(1) | -2(1)  |

|       |       |       |       |        |       |       |
|-------|-------|-------|-------|--------|-------|-------|
| C(15) | 44(1) | 57(1) | 62(1) | -10(1) | 7(1)  | -7(1) |
| C(16) | 41(1) | 70(1) | 55(1) | -9(1)  | 3(1)  | 0(1)  |
| C(17) | 42(1) | 62(1) | 48(1) | -1(1)  | 14(1) | 3(1)  |
| C(18) | 52(1) | 64(1) | 52(1) | -15(1) | 12(1) | 4(1)  |
| C(19) | 47(1) | 75(1) | 41(1) | -7(1)  | 6(1)  | 3(1)  |
| C(20) | 60(1) | 70(1) | 68(1) | -1(1)  | 13(1) | 14(1) |

Table 5. Hydrogen coordinates ( $\times 10^4$ ) and isotropic displacement parameters ( $\text{\AA}^2 \times 10^3$ ) for mo\_20140503D\_0m.

|        | x     | y    | z     | U(eq) |
|--------|-------|------|-------|-------|
| H(1)   | 4646  | 3810 | -1358 | 69    |
| H(2)   | 6047  | 4544 | -2356 | 86    |
| H(3)   | 7750  | 3519 | -2732 | 90    |
| H(4)   | 8038  | 1751 | -2134 | 81    |
| H(5)   | 6680  | 1038 | -1101 | 63    |
| H(8A)  | 4757  | 666  | 706   | 52    |
| H(8B)  | 6089  | 1279 | 587   | 52    |
| H(10A) | 3474  | 2465 | 1701  | 51    |
| H(10B) | 2892  | 3087 | 795   | 51    |
| H(11A) | 1728  | 1904 | -495  | 62    |
| H(11B) | 1953  | 619  | -433  | 62    |
| H(13A) | 5474  | 3484 | 1530  | 76    |
| H(13B) | 4940  | 4079 | 598   | 76    |
| H(13C) | 6155  | 3365 | 585   | 76    |
| H(15)  | -585  | 1620 | 83    | 65    |
| H(16)  | -1777 | 3175 | -269  | 67    |

---

|        |       |      |      |    |
|--------|-------|------|------|----|
| H(18)  | -40   | 4806 | 1910 | 66 |
| H(19)  | 1178  | 3275 | 2272 | 65 |
| H(20A) | -2394 | 5285 | 971  | 98 |
| H(20B) | -2199 | 5078 | -110 | 98 |
| H(20C) | -1253 | 5816 | 507  | 98 |

---

Table 6. Torsion angles [deg] for mo\_20140503D\_0m.

---

|                       |             |
|-----------------------|-------------|
| O(2)-S(1)-N(1)-C(11)  | 174.72(12)  |
| O(3)-S(1)-N(1)-C(11)  | 45.66(14)   |
| C(14)-S(1)-N(1)-C(11) | -70.13(13)  |
| O(2)-S(1)-N(1)-C(10)  | -50.58(13)  |
| O(3)-S(1)-N(1)-C(10)  | -179.65(11) |
| C(14)-S(1)-N(1)-C(10) | 64.56(13)   |
| C(6)-C(1)-C(2)-C(3)   | 1.5(3)      |
| C(1)-C(2)-C(3)-C(4)   | 0.7(3)      |
| C(2)-C(3)-C(4)-C(5)   | -1.8(3)     |
| C(3)-C(4)-C(5)-C(6)   | 0.7(3)      |
| C(4)-C(5)-C(6)-C(1)   | 1.4(3)      |
| C(4)-C(5)-C(6)-C(7)   | -179.25(16) |
| C(2)-C(1)-C(6)-C(5)   | -2.5(3)     |
| C(2)-C(1)-C(6)-C(7)   | 178.15(17)  |
| C(5)-C(6)-C(7)-C(12)  | -101.36(17) |
| C(1)-C(6)-C(7)-C(12)  | 77.99(19)   |
| C(5)-C(6)-C(7)-C(8)   | 44.1(2)     |
| C(1)-C(6)-C(7)-C(8)   | -136.56(16) |
| C(5)-C(6)-C(7)-C(9)   | 110.72(17)  |



---

|                        |             |
|------------------------|-------------|
| C(1)-C(6)-C(7)-C(9)    | -69.9(2)    |
| C(12)-C(7)-C(8)-C(9)   | -105.84(14) |
| C(6)-C(7)-C(8)-C(9)    | 109.72(15)  |
| C(7)-C(8)-C(9)-C(10)   | 107.77(15)  |
| C(7)-C(8)-C(9)-C(13)   | -109.24(15) |
| C(12)-C(7)-C(9)-C(8)   | 107.20(15)  |
| C(6)-C(7)-C(9)-C(8)    | -105.54(15) |
| C(12)-C(7)-C(9)-C(10)  | -0.31(19)   |
| C(6)-C(7)-C(9)-C(10)   | 146.95(14)  |
| C(8)-C(7)-C(9)-C(10)   | -107.51(14) |
| C(12)-C(7)-C(9)-C(13)  | -142.12(14) |
| C(6)-C(7)-C(9)-C(13)   | 5.1(2)      |
| C(8)-C(7)-C(9)-C(13)   | 110.69(16)  |
| C(11)-N(1)-C(10)-C(9)  | -61.80(16)  |
| S(1)-N(1)-C(10)-C(9)   | 162.48(10)  |
| C(8)-C(9)-C(10)-N(1)   | -34.40(18)  |
| C(13)-C(9)-C(10)-N(1)  | 179.72(13)  |
| C(7)-C(9)-C(10)-N(1)   | 35.28(17)   |
| C(10)-N(1)-C(11)-C(12) | 50.66(18)   |
| S(1)-N(1)-C(11)-C(12)  | -173.81(11) |
| C(6)-C(7)-C(12)-O(1)   | 16.1(2)     |
| C(8)-C(7)-C(12)-O(1)   | -129.35(16) |
| C(9)-C(7)-C(12)-O(1)   | 165.04(14)  |
| C(6)-C(7)-C(12)-C(11)  | -159.96(14) |
| C(8)-C(7)-C(12)-C(11)  | 54.62(19)   |
| C(9)-C(7)-C(12)-C(11)  | -11.0(2)    |
| N(1)-C(11)-C(12)-O(1)  | 170.34(14)  |

---

|                         |             |
|-------------------------|-------------|
| N(1)-C(11)-C(12)-C(7)   | -13.4(2)    |
| O(2)-S(1)-C(14)-C(15)   | -159.61(13) |
| O(3)-S(1)-C(14)-C(15)   | -27.14(16)  |
| N(1)-S(1)-C(14)-C(15)   | 86.80(14)   |
| O(2)-S(1)-C(14)-C(19)   | 26.58(15)   |
| O(3)-S(1)-C(14)-C(19)   | 159.04(13)  |
| N(1)-S(1)-C(14)-C(19)   | -87.01(14)  |
| C(19)-C(14)-C(15)-C(16) | 0.6(2)      |
| S(1)-C(14)-C(15)-C(16)  | -173.13(13) |
| C(14)-C(15)-C(16)-C(17) | 0.1(3)      |
| C(15)-C(16)-C(17)-C(18) | -1.1(3)     |
| C(15)-C(16)-C(17)-C(20) | 178.24(16)  |
| C(16)-C(17)-C(18)-C(19) | 1.4(3)      |
| C(20)-C(17)-C(18)-C(19) | -177.91(16) |
| C(17)-C(18)-C(19)-C(14) | -0.7(3)     |
| C(15)-C(14)-C(19)-C(18) | -0.3(2)     |
| S(1)-C(14)-C(19)-C(18)  | 173.44(13)  |

---

Symmetry transformations used to generate equivalent atoms:

Table 7. Hydrogen bonds for mo\_20140503D\_0m [Å and deg.].

---

| D-H...A | d(D-H) | d(H...A) | d(D...A) | <(DHA) |
|---------|--------|----------|----------|--------|
|---------|--------|----------|----------|--------|
